# Supplementary material for: Quantitative Supramolecular Heterodimerization for Efficient Energy Transfer
Source: PubMed Central journal article supplement (PMC7540262; doi:10.1002/anie.202006530), 2020-07-13
Supplement: ANIE-59-15963-s001.pdf [file ANIE-59-15963-s001.pdf]

Supporting Information

**Quantitative Supramolecular Heterodimerization for Efficient Energy Transfer**

*Guanglu Wu, Zehuan Huang, and Oren A. Scherman\**

anie\_202006530\_sm\_miscellaneous\_information.pdf

# Table of Contents

|                                                                                         |    |
|-----------------------------------------------------------------------------------------|----|
| SI-1 Materials and methods .....                                                        | 1  |
| SI-2 Synthesis and characterization .....                                               | 3  |
| SI-3 Mixture of $\text{VNH}_2$ and $\text{VOMe}$ homodimers .....                       | 7  |
| SI-4 Mixture of $\text{VNH}_2$ and $\text{VNMe}_2$ homodimers .....                     | 7  |
| SI-5 Mixture of $\text{VNH}_2$ and $\text{VSMe}$ homodimers .....                       | 8  |
| SI-6 Mixture of $\text{VH}$ and $\text{VNMe}_2$ homodimers.....                         | 9  |
| SI-7 Mixture of $\text{Np14H}$ and $\text{Np14NMe}_2$ homodimers .....                  | 10 |
| SI-8 Mixture of $\text{Np14H}$ , $\text{Np14CMe}_2$ , and $\text{CB}[8]$ .....          | 12 |
| SI-9 Mixture of $\text{Ant910H}$ , $\text{Np14CMe}_2$ , and $\text{CB}[8]$ .....        | 14 |
| SI-10 Mixture of $\text{Np14H}$ , $\text{Ant910CMe}_2$ , and $\text{CB}[8]$ .....       | 17 |
| SI-11 Diffusion coefficient of $\text{CB}[8]$ -directed dimers .....                    | 19 |
| SI-12 Complexation of $\text{Ant910H}$ and $\text{Np14CMe}_2$ with $\text{CB}[7]$ ..... | 20 |
| SI-13 Excitation spectrum of $\text{Ant910H}$ and $\text{Np14CMe}_2$ dimers.....        | 21 |
| Reference .....                                                                         | 21 |

## SI-1 Materials and methods

**Materials.** All materials were purchased from commercial suppliers as follows and used without further purification: 9,10-dibromoanthracene (98%, Sigma-Aldrich), 4-pyridinylboronic acid (90%, Sigma-Aldrich), tetrakis(triphenylphosphine) palladium(0) (99%, Alfa Aesar), 1-chloro-2,4-dinitrobenzene (98%, Alfa Aesar), aniline (99.5%, Sigma-Aldrich), 4-isopropylaniline (99%, Sigma-Aldrich), 2,2-Dimethyl-2-silapentane-5-sulfonate sodium salt (97%, Sigma-Aldrich). All other reagents and solvents were purchased from Sigma-Aldrich (UK) or Fisher Scientific and used as received. Cucurbit[8]uril (CB[8]) and CB[7] were synthesized and purified according to a published procedure<sup>[1]</sup>. Milli-Q water (18.2 MΩ·cm) was used to prepare all non-deuterated aqueous solutions.

**High Pressure Liquid Chromatography (HPLC).** HPLC was employed to purify and collect dicationic species by using a 150 x 21.2 mm Phenomenex C18 Kinetic-Evo column with a 5 micron pore size and a 110 Å particle size. A gradient from 5% acetonitrile 95% water to 100% acetonitrile was used with 0.1% TFA.

**Nuclear Magnetic Resonance Spectroscopy (NMR).** <sup>1</sup>H NMR, <sup>13</sup>C NMR, COSY, DOSY, ROESY, and NOESY spectra were acquired in heavy water (D<sub>2</sub>O) and recorded on a Bruker AVANCE 500 with TCI Cryoprobe system (500 MHz) being controlled by TopSpin2. NOESY experiments were carried out using a standard pulse sequence ‘noesygpshpp’ with a 2 s relaxation delay and a 1000 ms mixing time. The concentration of CB[8] or CB[7] deuterated aqueous solution was calibrated by an internal standard: DSS sodium salt. ROESY experiments were carried out using a modified EASY ROESY pulse sequence ‘roesyadsphpr’ with a 2 s relaxation delay and 200 ms mixing time.

**Variable-Temperature <sup>1</sup>H NMR (VT-NMR).** <sup>1</sup>H NMR spectra with variable temperature were recorded by a Bruker AVANCE 500 with TCI Cryoprobe system (500 MHz).

**Diffusion Ordered Spectroscopy (DOSY).** The <sup>1</sup>H DOSY experiments were carried out using a modified version of the Bruker sequence ledbpgp2s involving, typically, 32 scans over 16 steps of gradient variation from 10% to 80% of the maximum gradient. Diffusion coefficients were evaluated in Dynamic Centre (a standard Bruker software) and determined by fitting the intensity decays according to the following equation:

$$I = I_0 e^{-D\gamma^2 g^2 \delta^2 (\Delta - \delta/3)}$$

where  $I$  and  $I_0$  represent the signal intensities in the presence and absence of gradient pulses respectively,  $D$  is the diffusion coefficient,  $\gamma = 26753$  rad/s/Gauss is the <sup>1</sup>H gyromagnetic ratio,  $\delta = 2.4$  ms is duration of the gradient pulse,  $\Delta = 100$  ms is the total diffusion time and  $g$  is the applied gradient strength. The Monte Carlo simulation method was used for the error estimation of fitting parameters with a confidence level of 95%.

**UV/Vis Spectroscopy and Fluorescence Spectroscopy.** UV/Vis and fluorescence spectra were recorded on a Varian Cary 400 UV/Vis spectrophotometer and Varian Cary Eclipse fluorescence spectrophotometer, respectively, using a Hellma 114F-QS cuvette with 10x4 mm path length at 298 K.

**Electrospray Ionization Mass Spectrometry (ESI-MS).** ESI-MS spectra were acquired on a Thermo Fisher Q Exactive Orbitrap mass spectrometer with a nanospraying ion source. Positive mode was chosen for all the experiments with the working temperature of 320 °C and the capillary voltage of 1.5 kV. All the sample solutions were prepared in pure water.

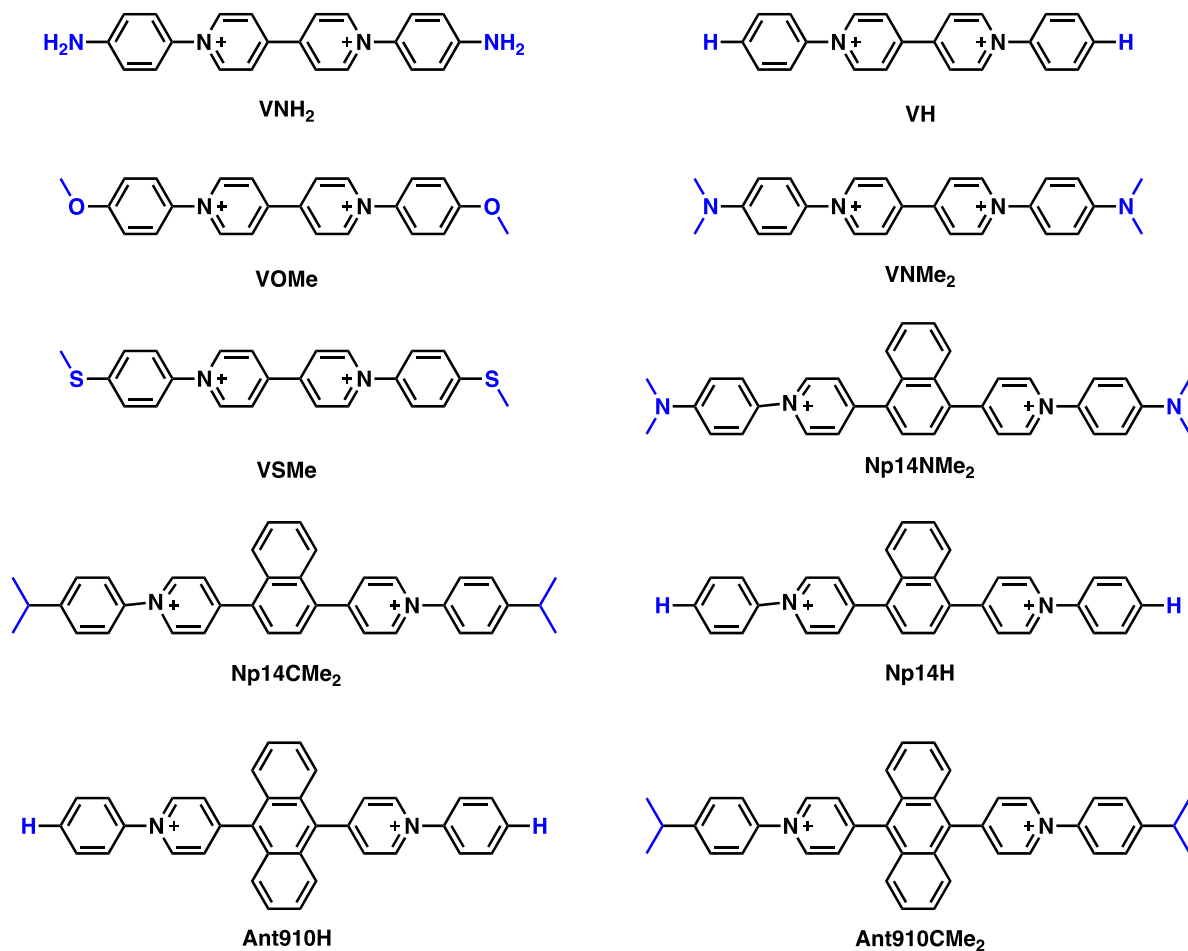

**Scheme S1.** Molecules related to this work (Counter anion is Cl<sup>-</sup>).

## SI-2 Synthesis and characterization

As exemplified by **Ant910X** ( $X = \text{H}, \text{CMe}_2$ ) in Scheme S2, a general synthesis of extended bis(*N*-arylpyridinium) derivatives in this work starts with Suzuki-Miyaura cross-coupling of two pyridin-4-yl groups onto the fluorophore core, followed by the transformation of the pyridin-4-yl groups into arylpyridinium salts through a Zincke reaction.<sup>[2]</sup> The synthesis of **VX** ( $X = \text{H}, \text{NH}_2, \text{OMe}, \text{SMe}, \text{NMe}_2$ ),<sup>[3-5]</sup> **Ant910DNB**,<sup>[6]</sup> and **Np14X** ( $X = \text{DNB}, \text{H}, \text{NMe}_2$ ) were reported in our previous work.<sup>[6-7]</sup> The final Zincke reactions are pseudo-quantitative, generally resulting in an isolation yield larger than 80 % even in a 10 mg scale reaction.

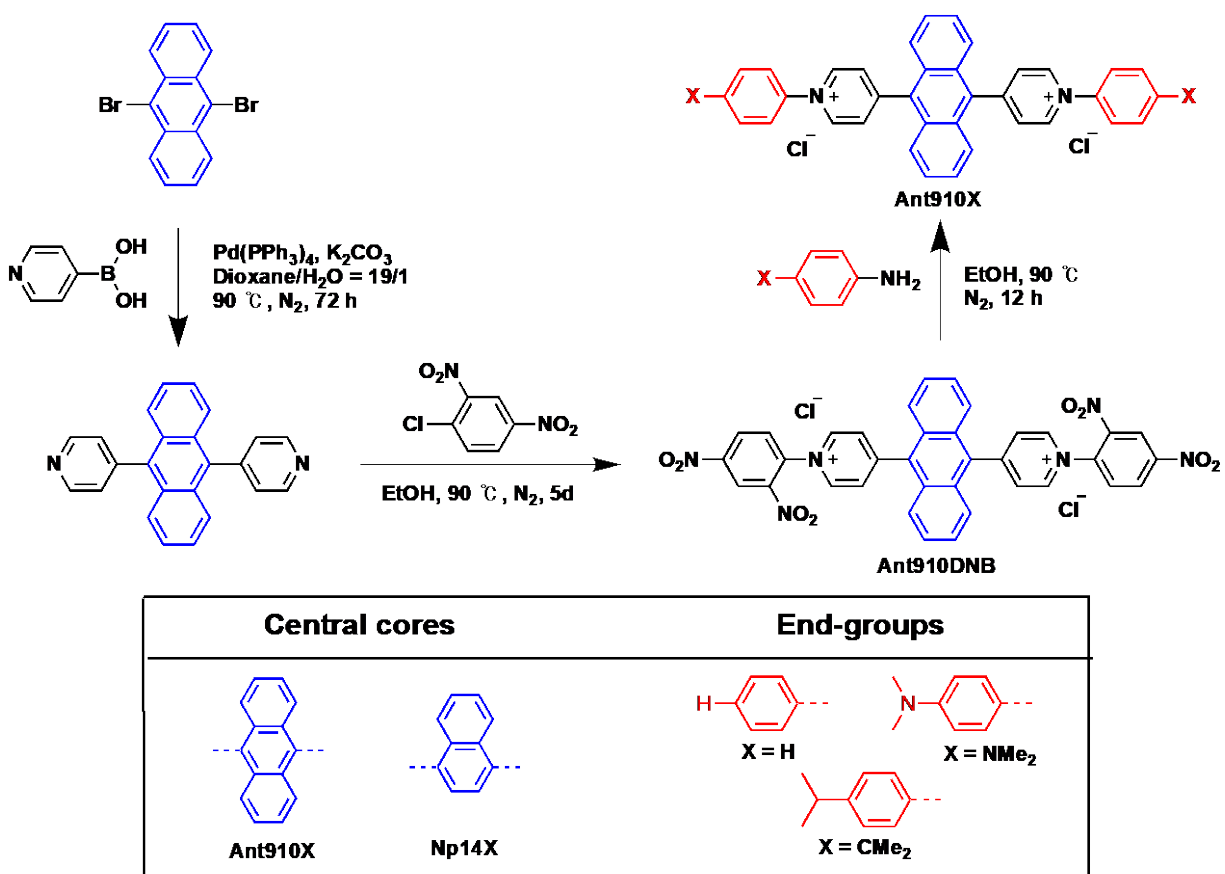

Scheme S2. Synthetic route of **Ant910X**.

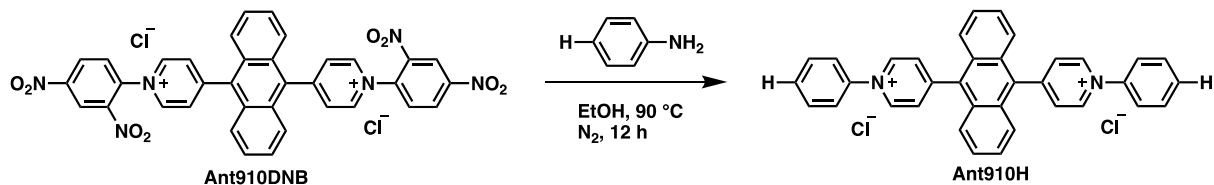

**4,4'-(anthracene-9,10-diyl)bis(1-phenylpyridin-1-ium) chloride (Ant910H).** Aniline (30  $\mu\text{L}$ , excess) and 4,4'-(anthracene-9,10-diyl)bis(1-(2,4-dinitrophenyl)pyridin-1-ium) chloride (**Ant910DNB**, 6 mg, 8.6  $\mu\text{mol}$ ) were refluxed in ethanol (10 mL) at 90  $^{\circ}\text{C}$  for 12 h under nitrogen atmosphere. After removing solvent under reduced pressure, the solid was re-dissolved in MeOH (1 mL) and was added dropwise into diethyl ether (30 mL) to precipitate products. The suspension was then centrifuged at 8000 rpm for 10 mins at 4  $^{\circ}\text{C}$  and the supernatant was decanted. The centrifugation/decanting cycle was repeated another two times in order to wash off excess of aniline. Drying in vacuum oven gave 4 mg of orange solid in 89 % yield.  $^1\text{H}$  NMR (500 MHz,  $\text{D}_2\text{O}$ )  $\delta$  (ppm):  $\delta$  9.35 (d,  $J = 6.7$  Hz, 4H), 8.41 (d,  $J = 6.5$  Hz, 4H), 7.87 (dd,  $J = 6.8, 2.8$  Hz, 4H), 7.80 – 7.74 (m, 6H), 7.68 (dd,  $J = 6.8, 3.2$  Hz, 4H), 7.59 (dd,  $J = 6.9, 3.2$  Hz, 4H).  $^{13}\text{C}$  NMR (126 MHz,  $\text{D}_2\text{O}$ )  $\delta$  (ppm): 157.72, 144.50, 132.60, 131.72, 131.10, 130.97, 130.62, 128.13, 127.47, 125.32, 124.12. LCMS:  $m/z$   $[\text{M}-2\text{Cl}]^{2+}$  calcd. for  $\text{C}_{36}\text{H}_{26}\text{N}_2^{2+}$ : 243.1, found: 243.4.

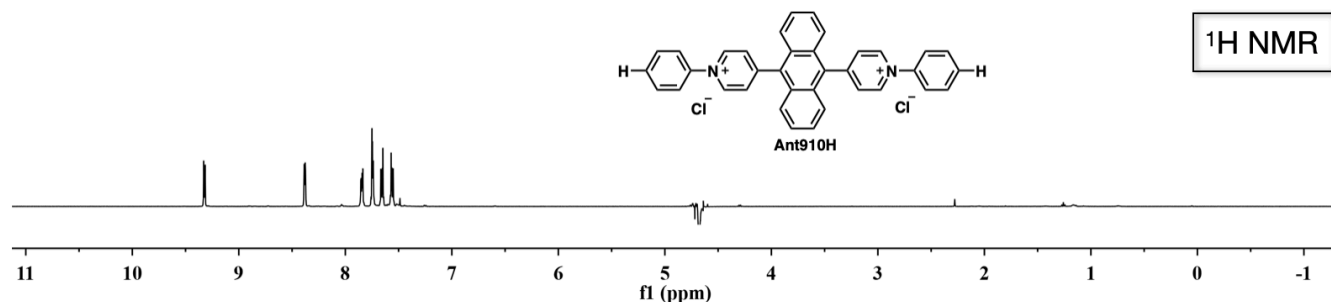

$^{13}\text{C}$  NMR (126 MHz,  $\text{D}_2\text{O}$ )  $\delta$  157.72, 144.50, 132.60, 131.72, 131.10, 130.97, 130.62, 128.13, 127.47, 125.32, 124.12.

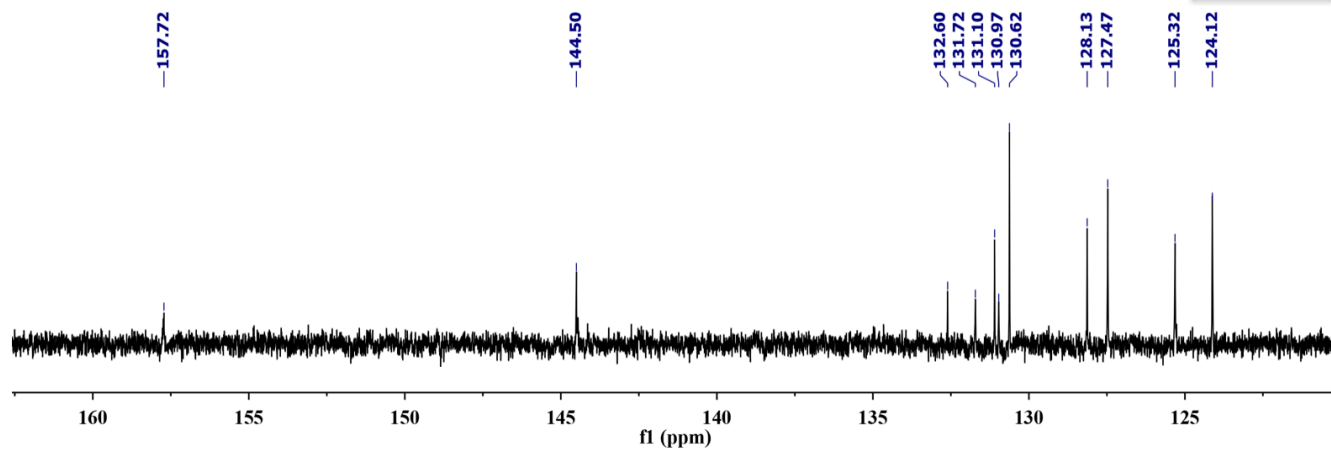

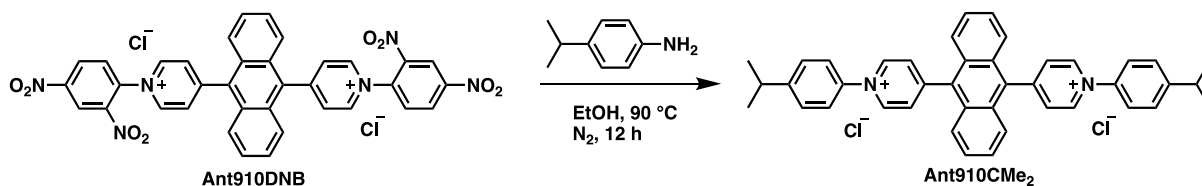

**4,4'-(anthracene-9,10-diyl)bis(1-(4-isopropylphenyl)pyridin-1-ium) chloride (Ant910CMe<sub>2</sub>).** Ant910CMe<sub>2</sub> was prepared following the same synthetic route as that of Ant910H except using 4-isopropylaniline instead of aniline as the starting material. Yield 83 %, 15 mg. <sup>1</sup>H NMR (500 MHz, D<sub>2</sub>O) δ (ppm): 9.31 (d, *J* = 6.3 Hz, 4H), 8.38 (d, *J* = 6.4 Hz, 4H), 7.79 (d, *J* = 8.3 Hz, 4H), 7.70 – 7.63 (m, 8H), 7.58 (dd, *J* = 6.9, 3.2 Hz, 4H), 3.08 (p, *J* = 7.0 Hz, 2H), 1.28 (d, *J* = 6.9 Hz, 12H). <sup>13</sup>C NMR (126 MHz, MeOD) δ (ppm): 157.73, 153.30, 144.84, 140.94, 132.86, 130.81, 128.49, 128.44, 127.35, 125.38, 124.13, 33.88, 22.75. LCMS: *m/z* [M-2Cl]<sup>2+</sup> calcd. for C<sub>42</sub>H<sub>38</sub>N<sub>2</sub><sup>2+</sup>: 285.1, found: 285.5.

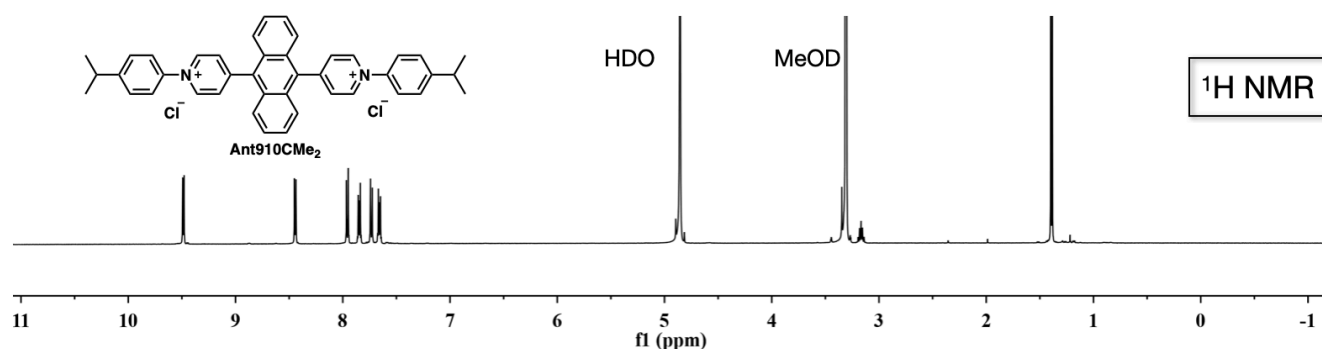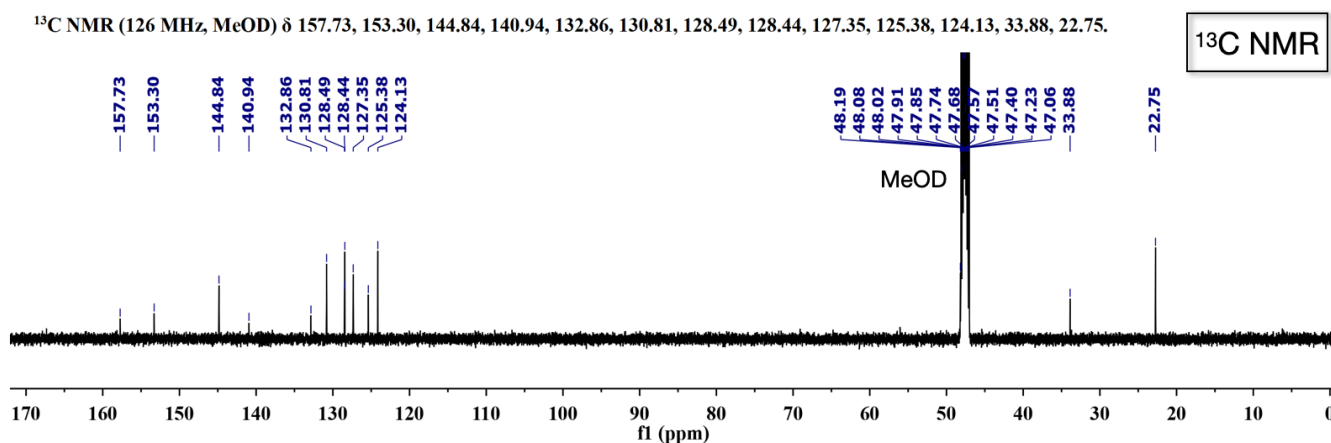

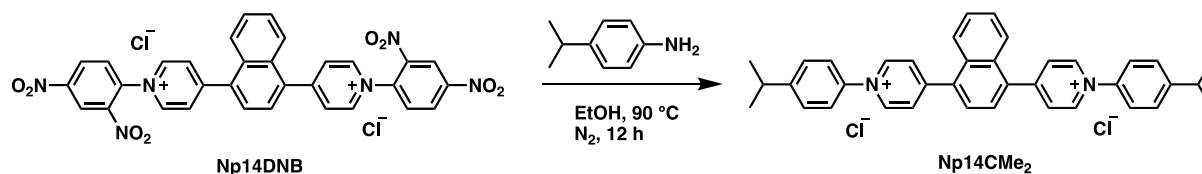

**4,4'-(naphthalene-1,4-diyl)bis(1-(4-isopropylphenyl)pyridin-1-ium) chloride (Np14CMe<sub>2</sub>).** Np14CMe<sub>2</sub> was prepared following the same synthetic route as that of Ant910CMe<sub>2</sub> except using Np14DNB instead of Ant910DNB as the starting material. Yield 87 %, 10 mg. <sup>1</sup>H NMR (500 MHz, D<sub>2</sub>O) δ (ppm): 9.24 (d, *J* = 6.9 Hz, 4H), 8.49 (d, *J* = 6.8 Hz, 4H), 8.10 (dd, *J* = 6.5, 3.3 Hz, 2H), 7.93 (s, 2H), 7.83 – 7.77 (m, 6H), 7.70 (d, *J* = 8.6 Hz, 4H), 3.14 (p, *J* = 6.9 Hz, 2H), 1.34 (d, *J* = 6.9 Hz, 12H). <sup>13</sup>C NMR (126 MHz, D<sub>2</sub>O) δ (ppm): 157.53, 153.35, 143.95, 140.23, 136.45, 130.12, 129.05, 128.57, 128.49, 127.69, 125.11, 123.87, 33.42, 22.98. LCMS: *m/z* [M-2Cl]<sup>2+</sup> calcd. for C<sub>38</sub>H<sub>36</sub>N<sub>2</sub><sup>2+</sup>: 260.1, found: 260.4.

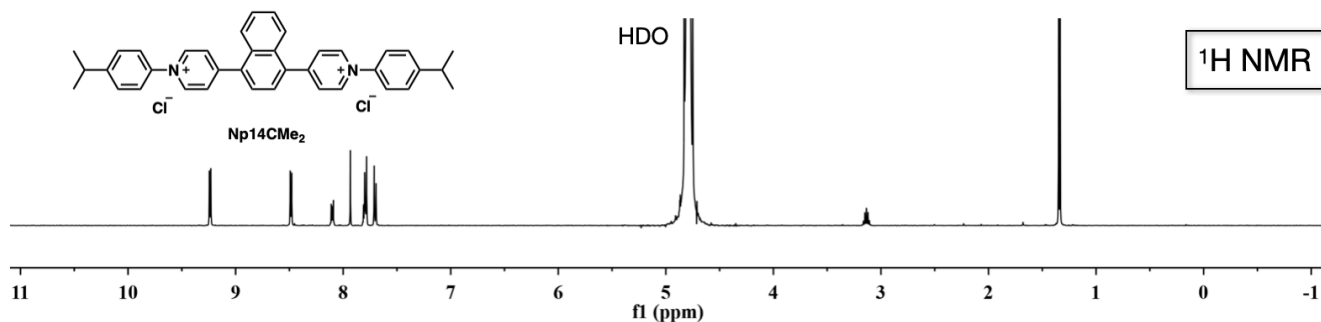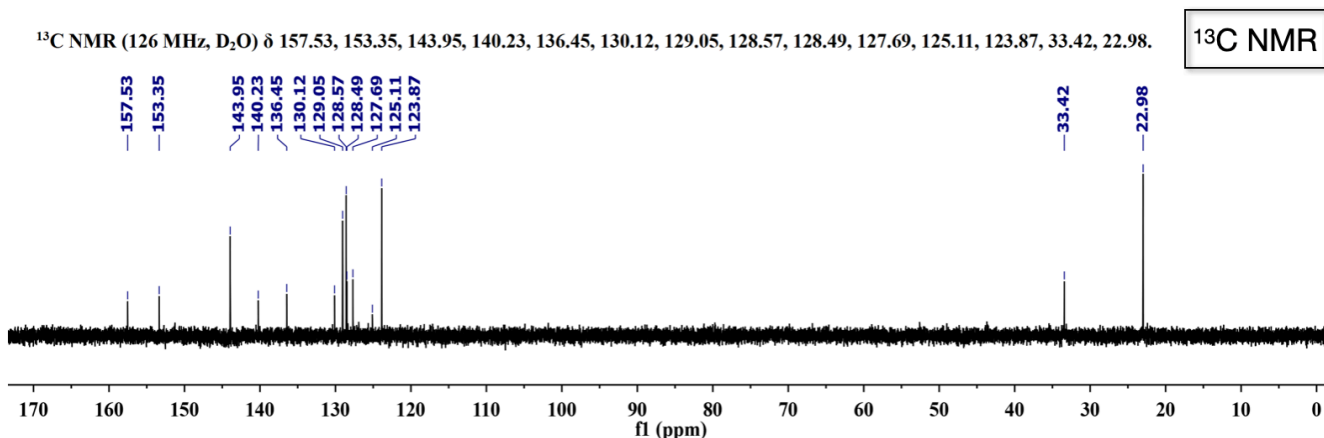



### SI-3 Mixture of $\text{VNH}_2$ and $\text{VOMe}$ homodimers

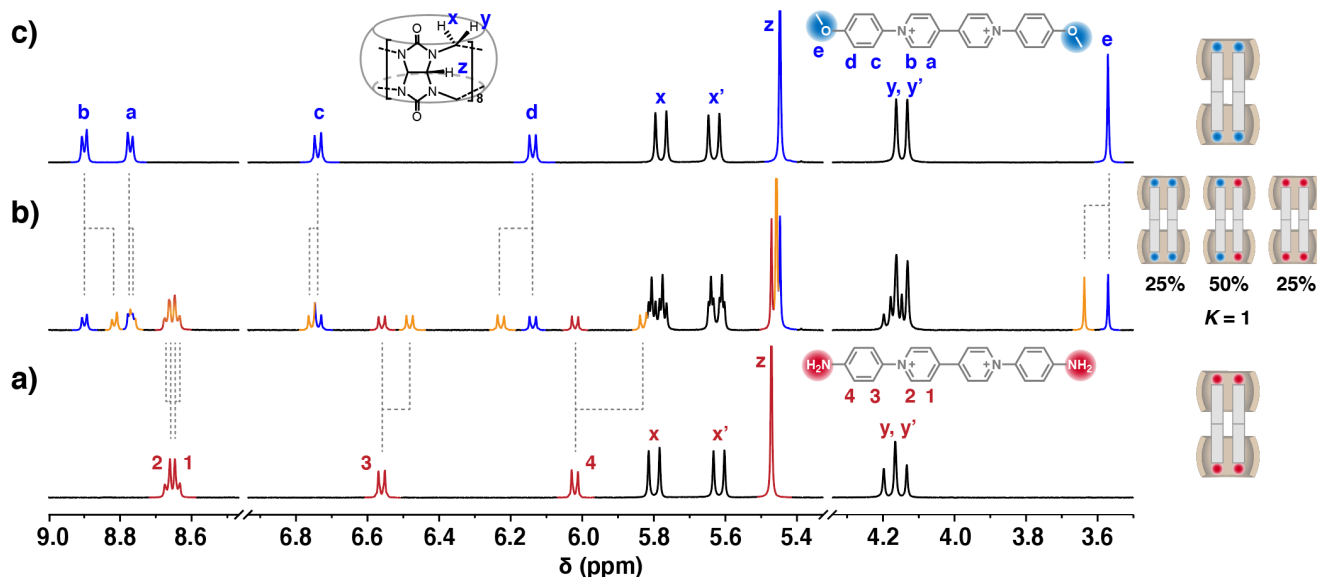

**Figure S1.**  $^1\text{H}$  NMR spectra of a)  $(\text{VNH}_2)_2 \cdot \text{CB}[8]_2$ , c)  $(\text{VOMe})_2 \cdot \text{CB}[8]_2$ , and b) the equilibrium products of a 50/50 mixture of  $(\text{VNH}_2)_2 \cdot \text{CB}[8]_2$  and  $(\text{VOMe})_2 \cdot \text{CB}[8]_2$  in  $\text{D}_2\text{O}$  at 298 K. The  $K$  value was calculated according to Eq. 1 in the manuscript, where relative concentration ratios of equilibrium products ([AA], [BB], and [AB]) were quantified from their proton integrations in the  $^1\text{H}$  NMR spectra.

### SI-4 Mixture of $\text{VNH}_2$ and $\text{VNMe}_2$ homodimers

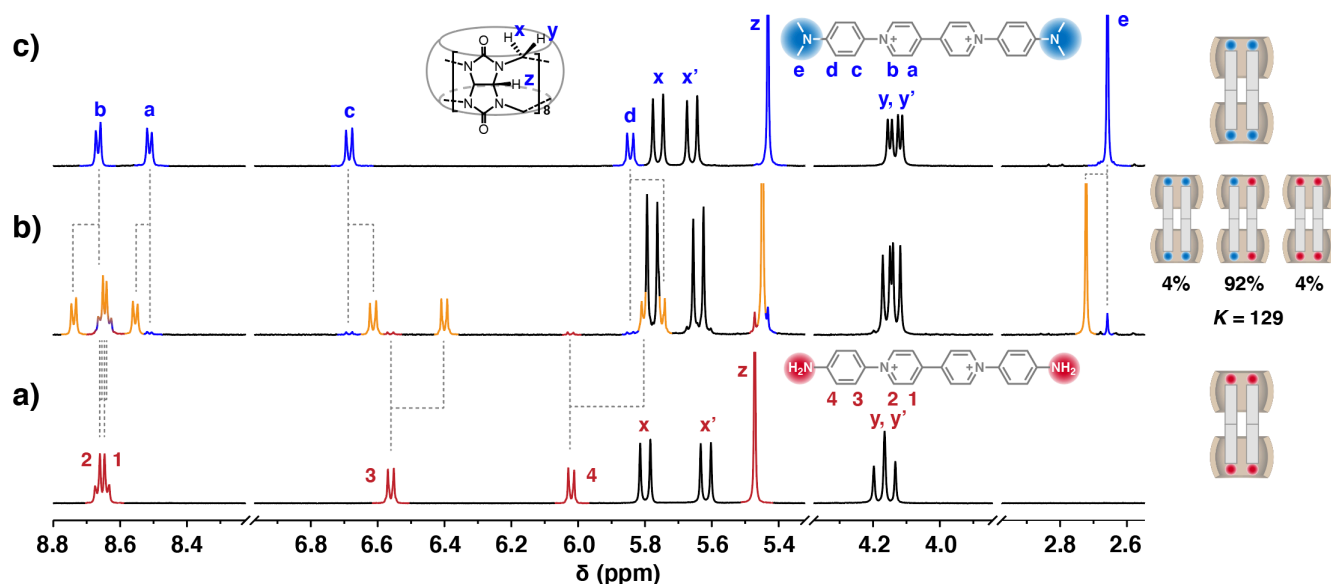

**Figure S2.**  $^1\text{H}$  NMR spectra of a)  $(\text{VNH}_2)_2 \cdot \text{CB}[8]_2$ , c)  $(\text{VNMe}_2)_2 \cdot \text{CB}[8]_2$ , and b) the equilibrium products of a 50/50 mixture of  $(\text{VNH}_2)_2 \cdot \text{CB}[8]_2$  and  $(\text{VNMe}_2)_2 \cdot \text{CB}[8]_2$  in  $\text{D}_2\text{O}$  at 298 K. The  $K$  value was calculated according to Eq. 1 in the manuscript, where relative concentration ratios of equilibrium products ([AA], [BB], and [AB]) were quantified from their proton integrations in the  $^1\text{H}$  NMR spectra.

## SI-5 Mixture of $\text{VNH}_2$ and $\text{VSMe}$ homodimers

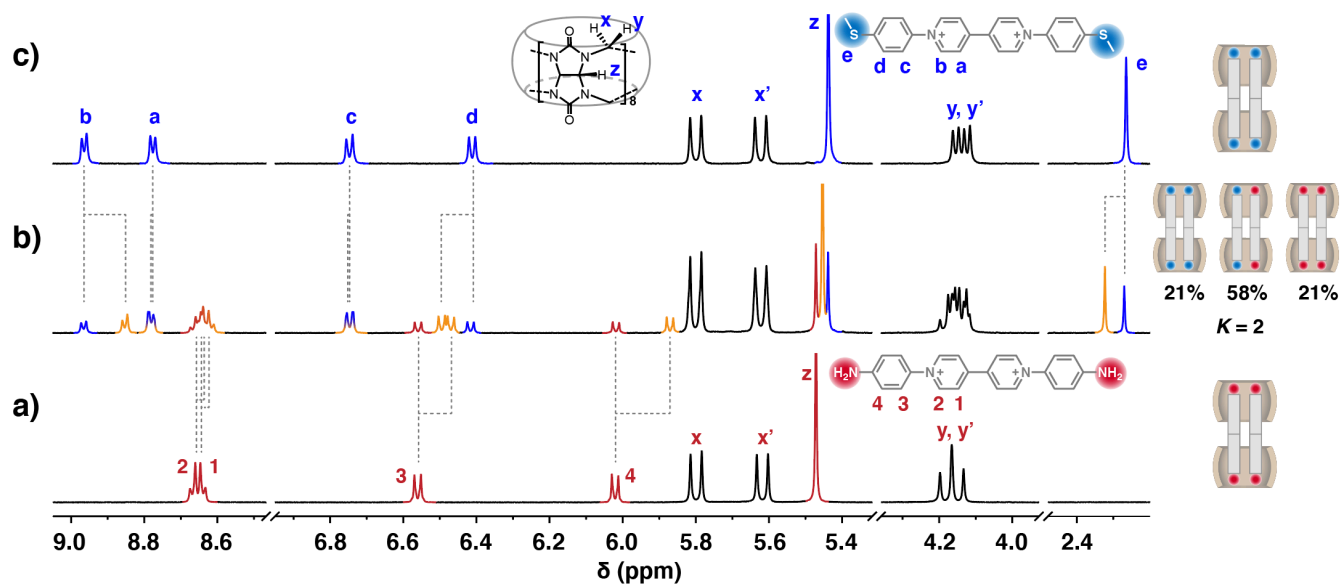

**Figure S3.**  $^1\text{H}$  NMR spectra of a)  $(\text{VNH}_2)_2 \cdot \text{CB}[8]_2$ , c)  $(\text{VSMe})_2 \cdot \text{CB}[8]_2$ , and b) the equilibrium products of a 50/50 mixture of  $(\text{VNH}_2)_2 \cdot \text{CB}[8]_2$  and  $(\text{VSMe})_2 \cdot \text{CB}[8]_2$  in  $\text{D}_2\text{O}$  at 298 K. The  $K$  value was calculated according to Eq. 1 in the manuscript, where relative concentration ratios of equilibrium products ( $[\text{AA}]$ ,  $[\text{BB}]$ , and  $[\text{AB}]$ ) were quantified from their proton integrations in the  $^1\text{H}$  NMR spectra.

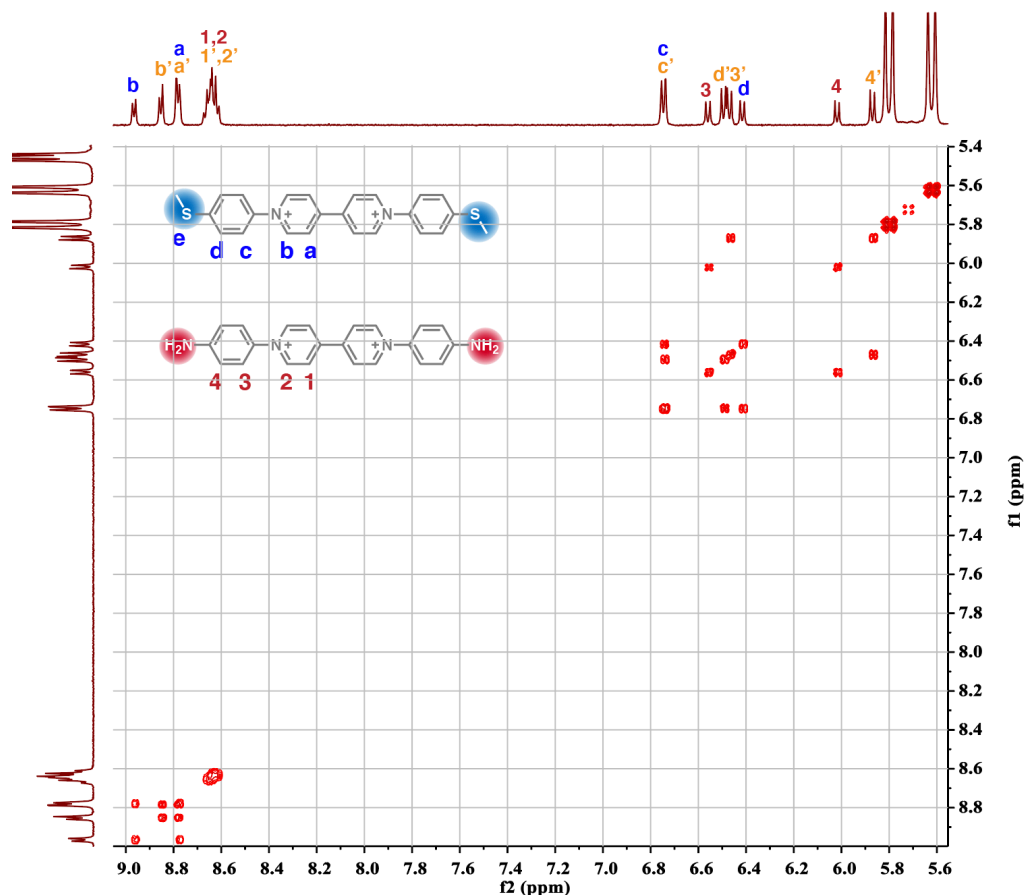

**Figure S4.** COSY spectrum of the equilibrium products of a 50/50 mixture of  $(\text{VNH}_2)_2 \cdot \text{CB}[8]_2$  and  $(\text{VSMe})_2 \cdot \text{CB}[8]_2$  in  $\text{D}_2\text{O}$  at 298 K, which is carried out in order to assign protons correctly.

## SI-6 Mixture of VH and VNMe<sub>2</sub> homodimers

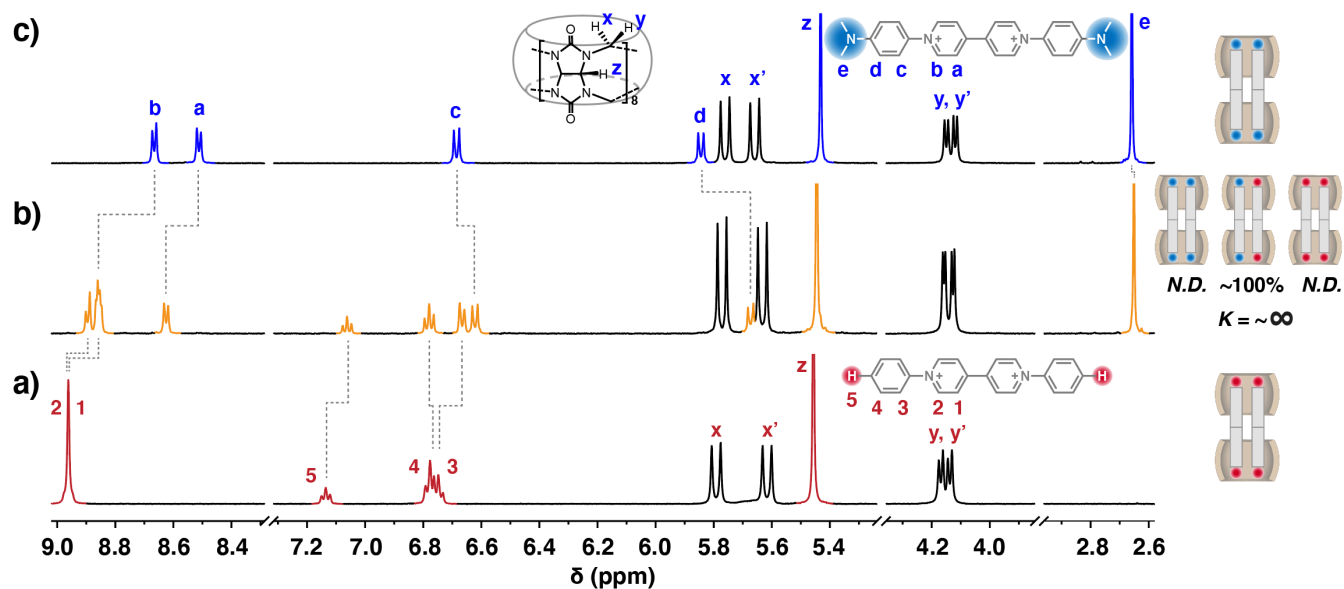

**Figure S5.** <sup>1</sup>H NMR spectra of a) (VH)<sub>2</sub>•CB[8]<sub>2</sub>, c) (VNMe<sub>2</sub>)<sub>2</sub>•CB[8]<sub>2</sub>, and b) the equilibrium products of a 50/50 mixture of (VH)<sub>2</sub>•CB[8]<sub>2</sub> and (VNMe<sub>2</sub>)<sub>2</sub>•CB[8]<sub>2</sub> in D<sub>2</sub>O at 298 K. The K value was calculated according to Eq. 1 in the manuscript, where relative concentration ratios of equilibrium products ([AA], [BB], and [AB]) were quantified from their proton integrations in the <sup>1</sup>H NMR spectra.

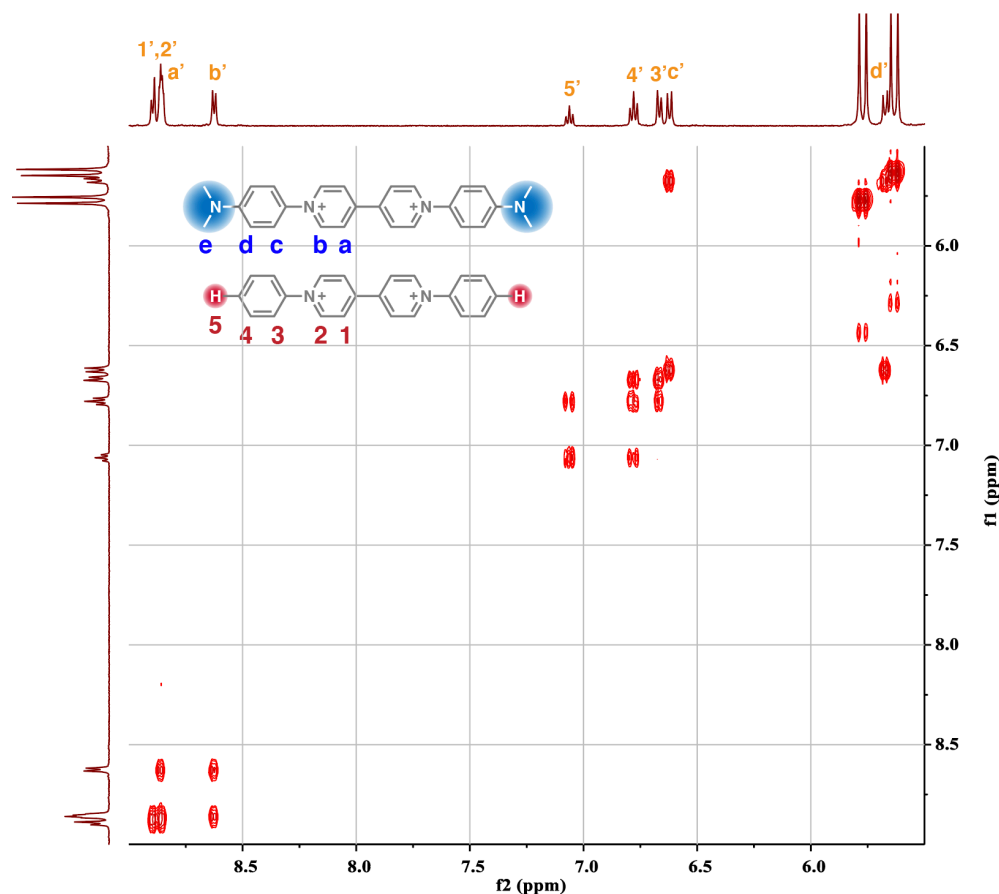

**Figure S6.** COSY spectrum of VH•VNMe<sub>2</sub>•CB[8]<sub>2</sub> heterodimer in D<sub>2</sub>O at 298 K.

## SI-7 Mixture of Np14H and Np14NMe<sub>2</sub> homodimers

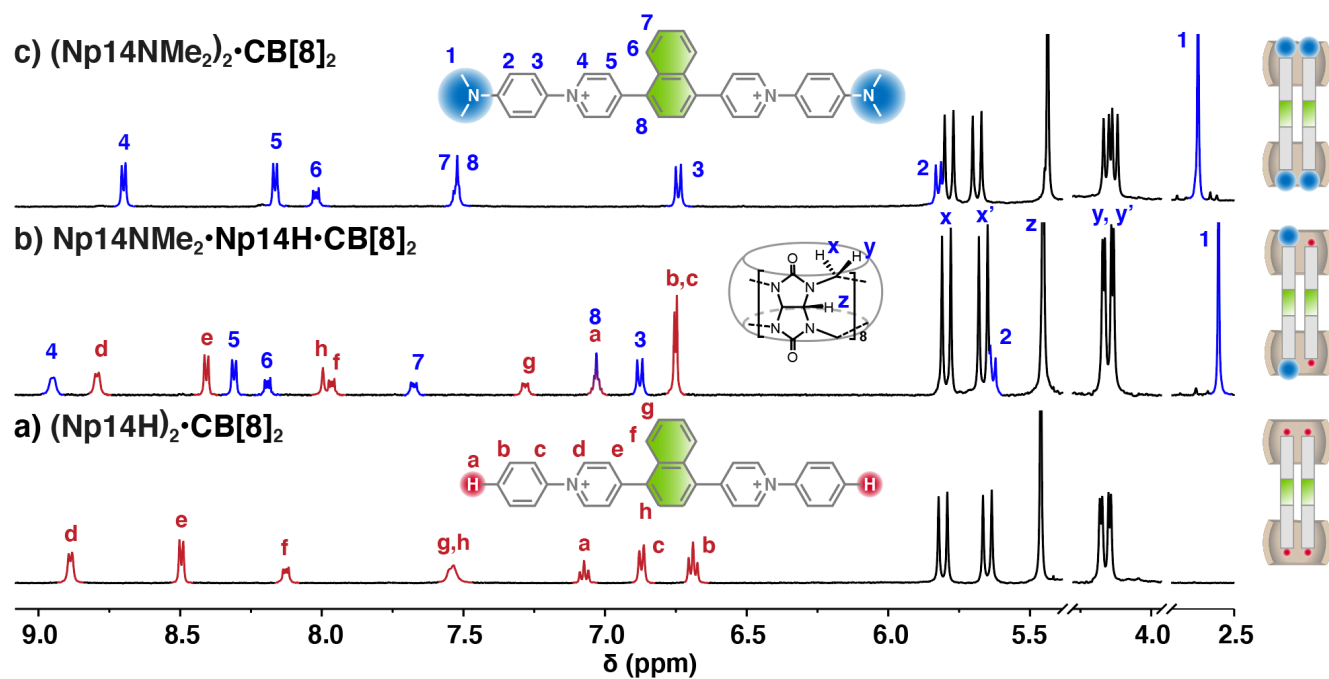

**Figure S7.** <sup>1</sup>H NMR spectra of a) (Np14H)<sub>2</sub>•CB[8]<sub>2</sub>, c) (Np14NMe<sub>2</sub>)<sub>2</sub>•CB[8]<sub>2</sub>, and b) the equilibrium products of a 50/50 mixture of (Np14H)<sub>2</sub>•CB[8]<sub>2</sub> and (Np14NMe<sub>2</sub>)<sub>2</sub>•CB[8]<sub>2</sub> in D<sub>2</sub>O at 298 K.

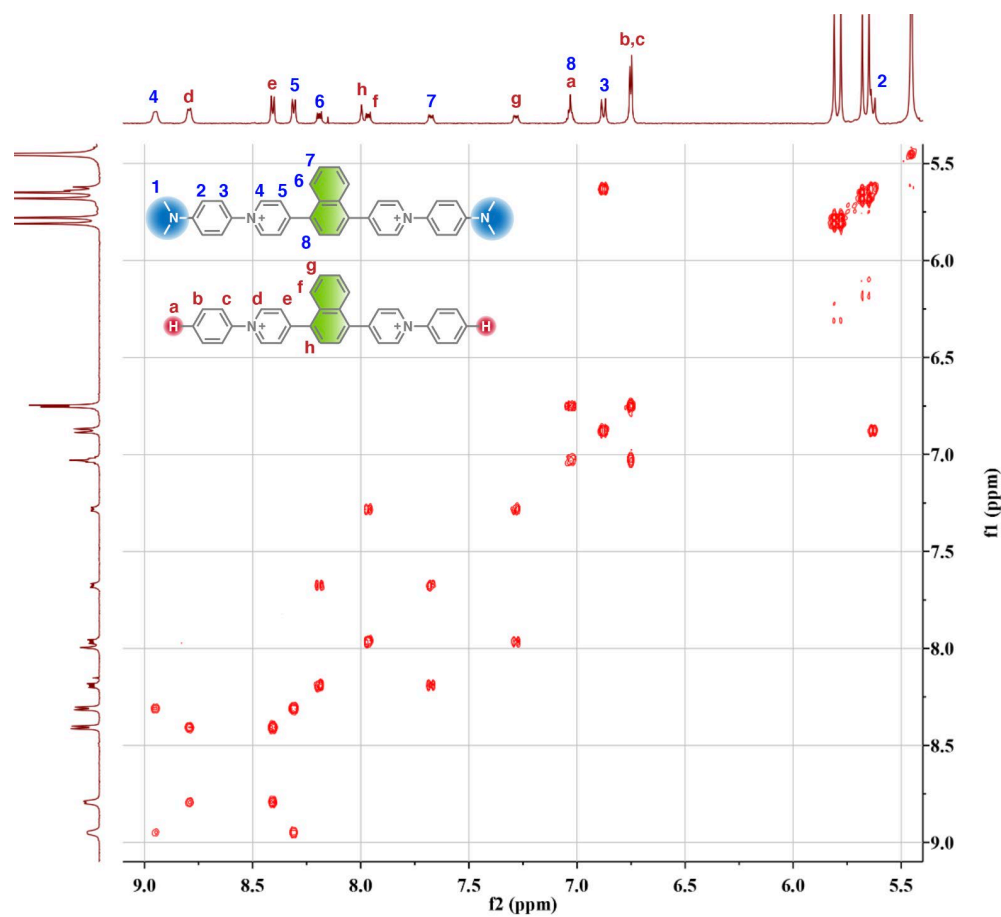

**Figure S8.** COSY spectrum of Np14H•Np14NMe<sub>2</sub>•CB[8]<sub>2</sub> heterodimer in D<sub>2</sub>O at 298 K.

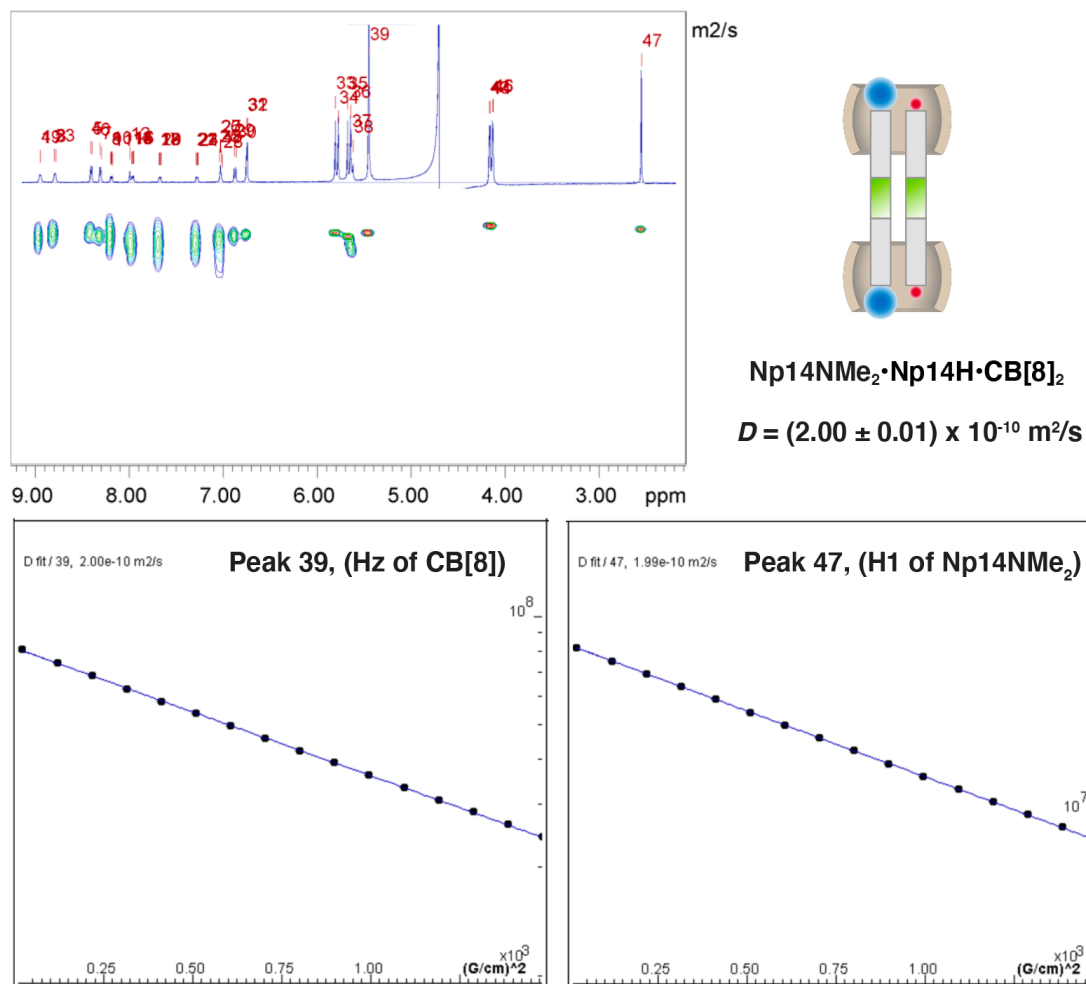

**Figure S9.** DOSY analysis for Np14H•Np14NMe<sub>2</sub>•CB[8]<sub>2</sub> heterodimer in D<sub>2</sub>O at 298 K, showing one complex with a diffusion coefficient of 2.00 x 10<sup>-10</sup> m<sup>2</sup>/s.

# SI-8 Mixture of Np14H, Np14CMe<sub>2</sub>, and CB[8]

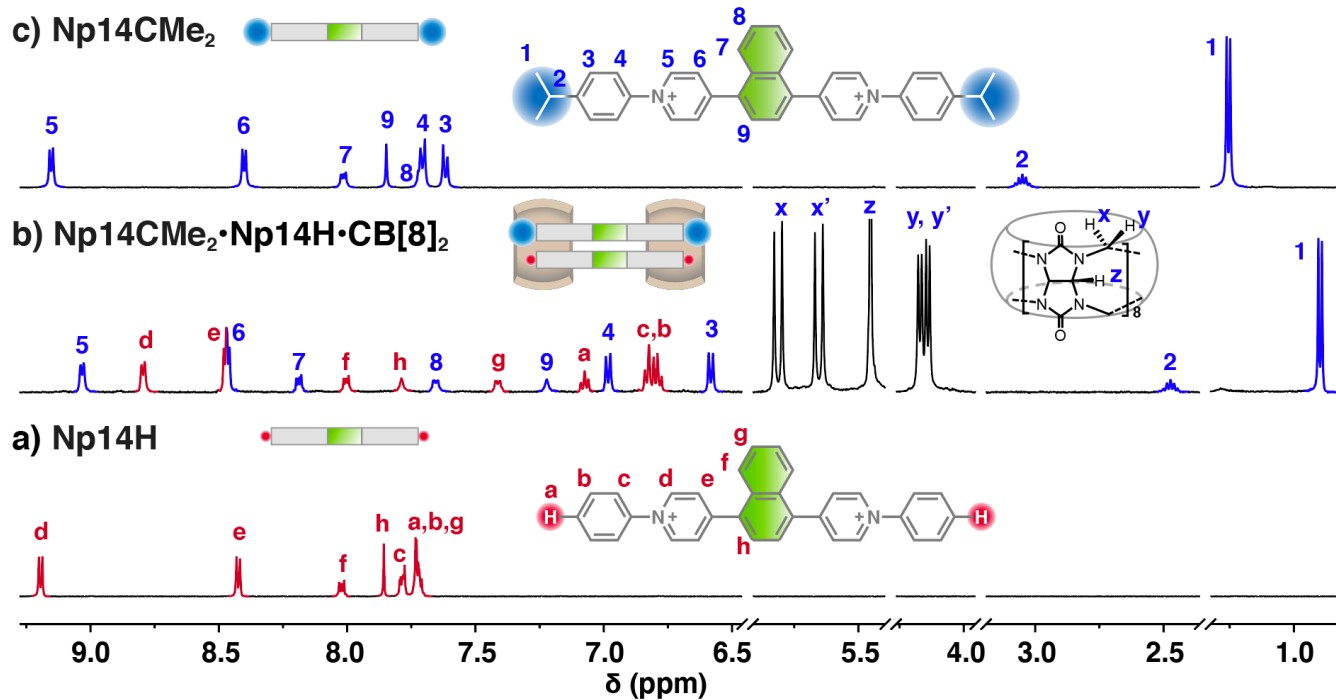

Figure S10. <sup>1</sup>H NMR spectra of a) Np14H, b) Np14H•Np14CMe<sub>2</sub>•CB[8]<sub>2</sub>, c) Np14CMe<sub>2</sub> in D<sub>2</sub>O at 298 K. Protons are assigned using the COSY and NOESY spectra in Figure S11-12.

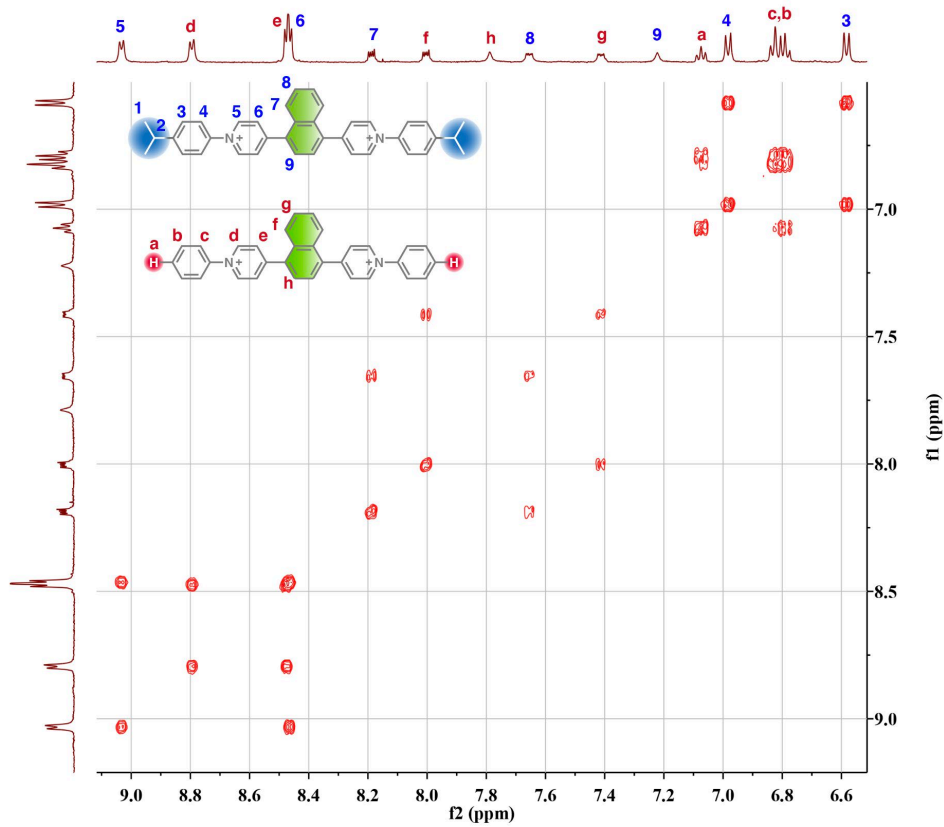

Figure S11. COSY spectrum of Np14H•Np14CMe<sub>2</sub>•CB[8]<sub>2</sub> heterodimer in D<sub>2</sub>O at 298 K.

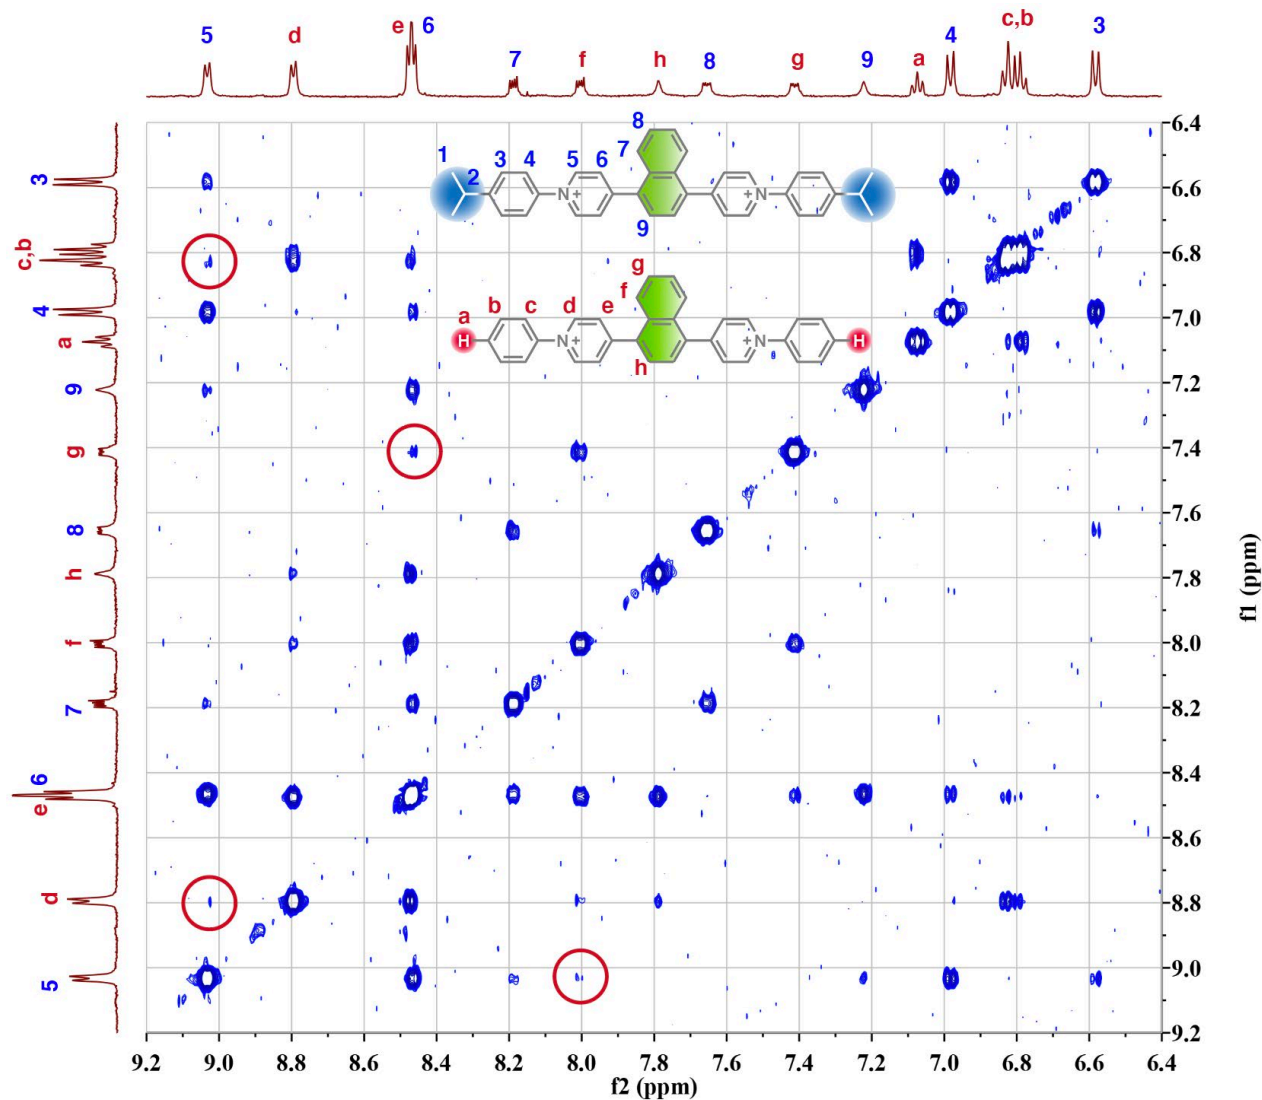

**Figure S12.** NOESY spectrum of **Np14H• Np14CMe<sub>2</sub>•CB[8]<sub>2</sub>** heterodimer in D<sub>2</sub>O at 298 K (mixing time: 1000 ms).

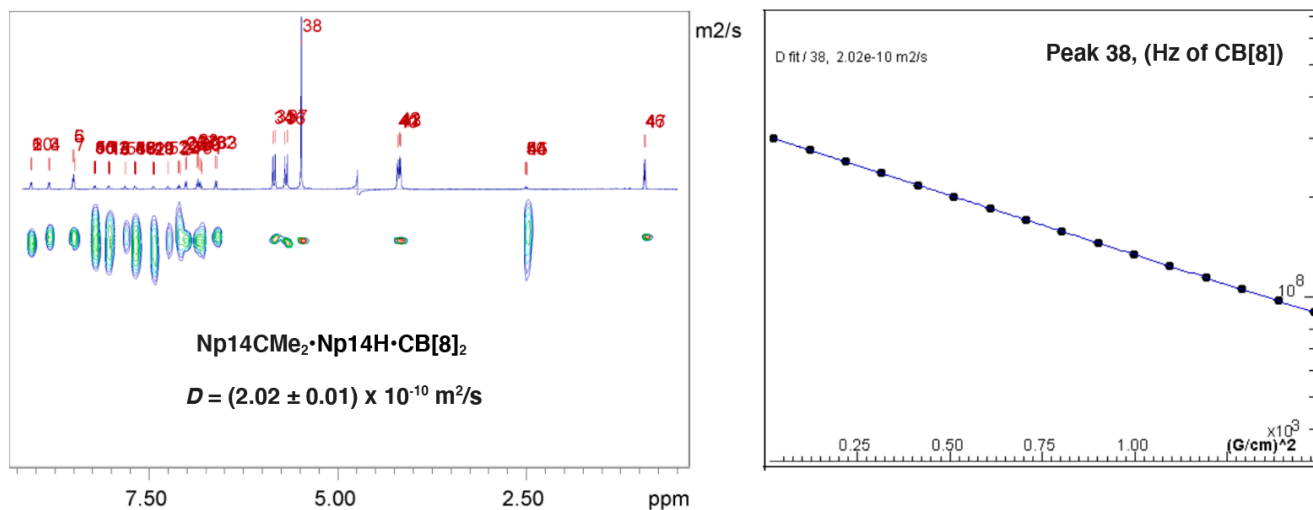

**Figure S13.** DOSY analysis for **Np14H• Np14CMe<sub>2</sub>•CB[8]<sub>2</sub>** heterodimer in D<sub>2</sub>O at 298 K, showing one complex with a diffusion coefficient of  $2.02 \times 10^{-10} \text{ m}^2/\text{s}$ .

# SI-9 Mixture of Ant910H, Np14CMe<sub>2</sub>, and CB[8]

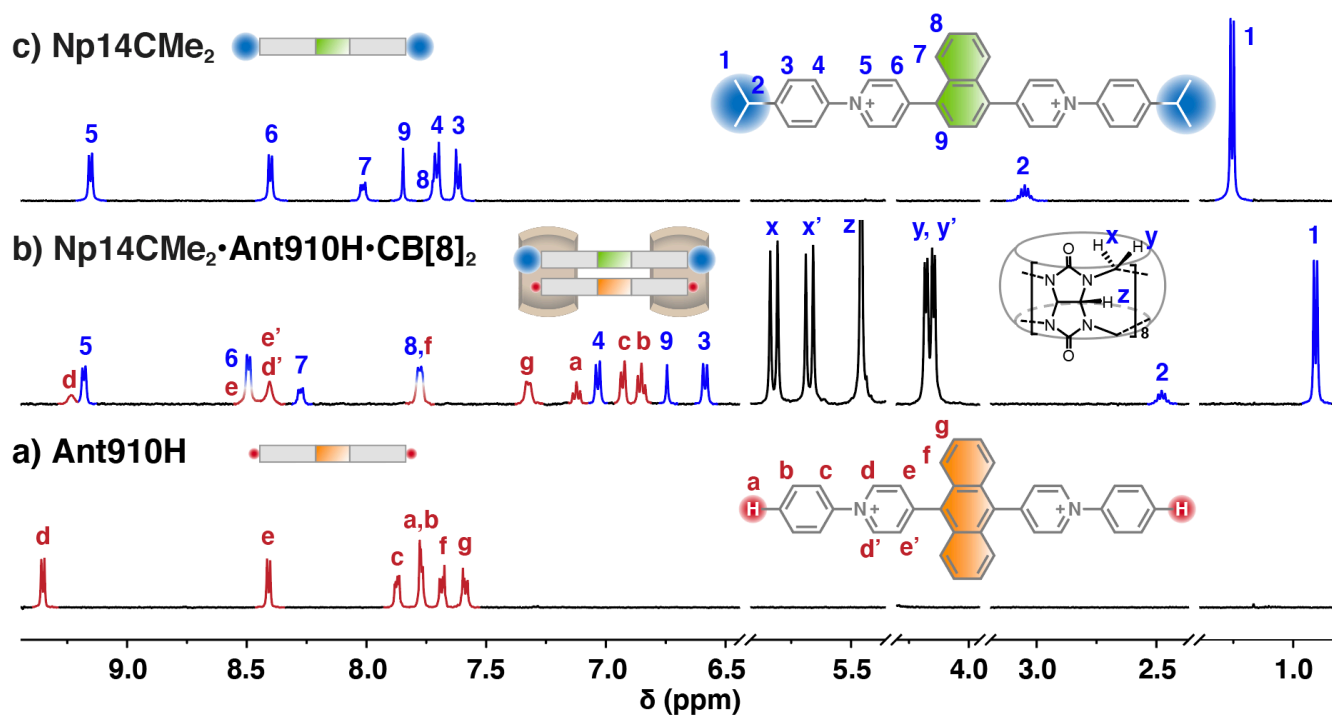

Figure S14. <sup>1</sup>H NMR spectra of a) Ant910H, b) Np14CMe<sub>2</sub>•Ant910H•CB[8]<sub>2</sub>, c) Np14CMe<sub>2</sub> in D<sub>2</sub>O at 298 K. Protons are assigned using the COSY and NOESY spectra in Figure S16-17.

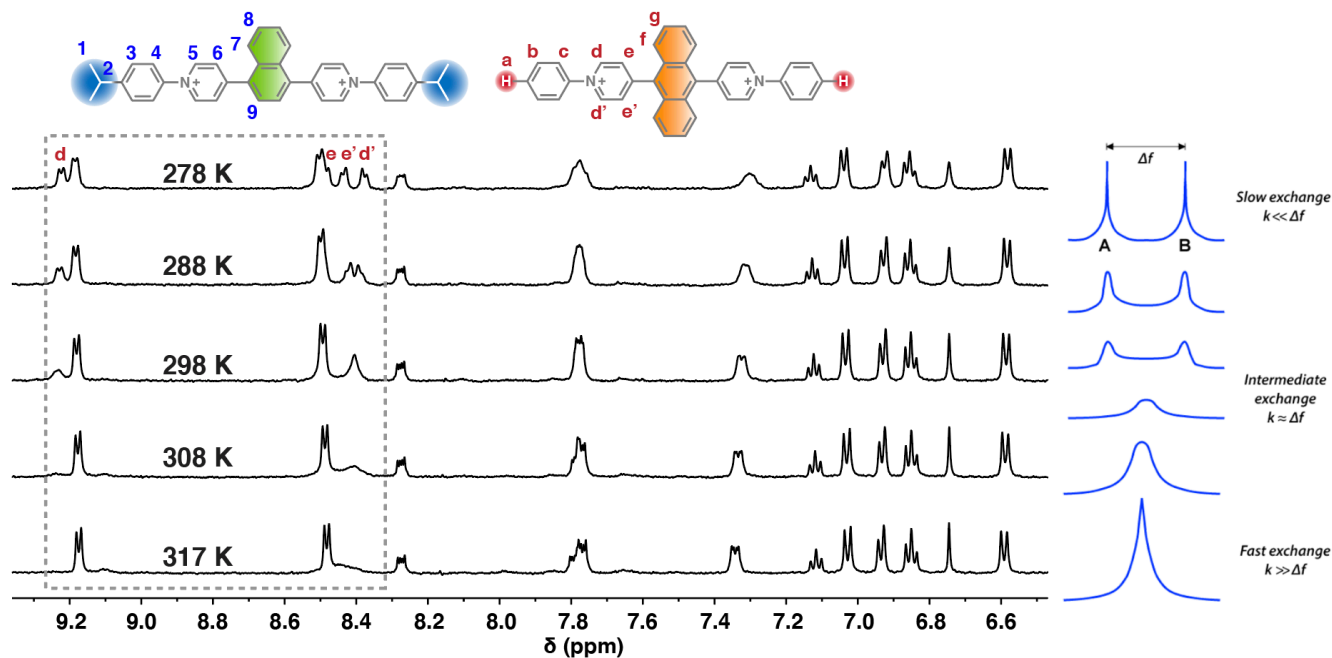

Figure S15. VT-NMR spectra of Np14CMe<sub>2</sub>•Ant910H•CB[8]<sub>2</sub> in D<sub>2</sub>O.



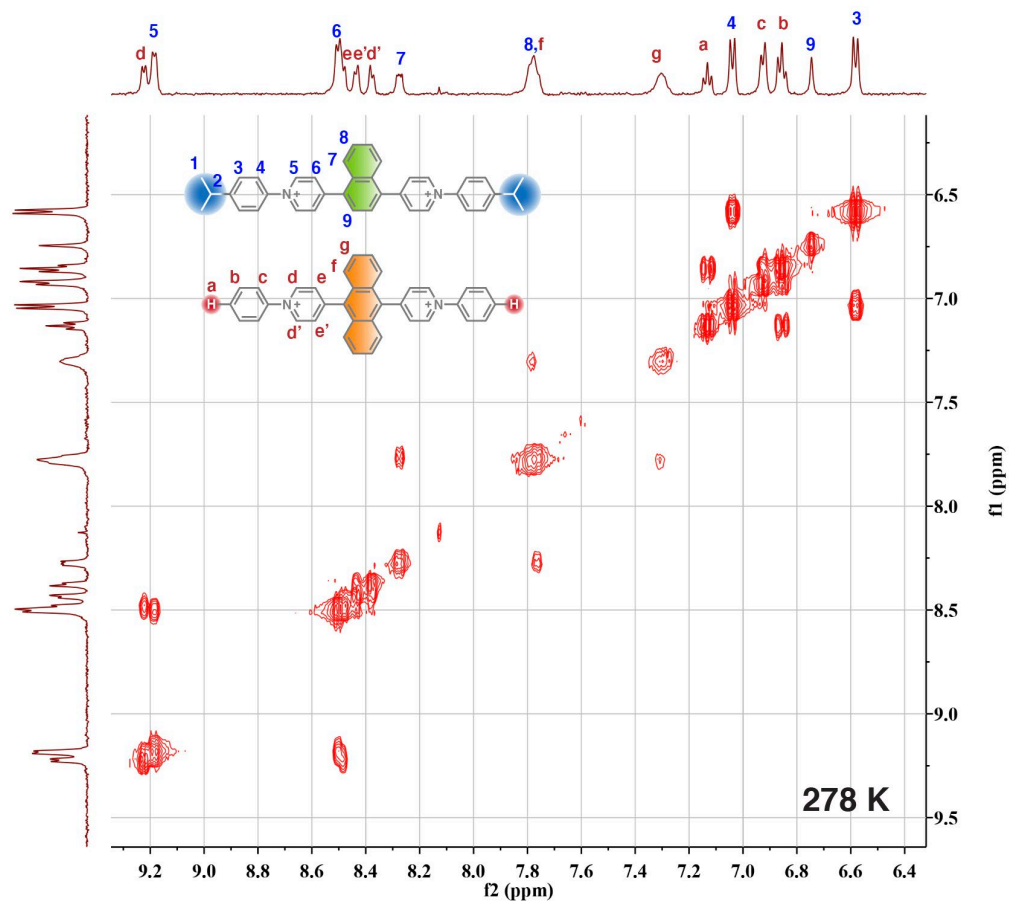

Figure S16. COSY spectrum of  $\text{Np14CMe}_2 \cdot \text{Ant910H} \cdot \text{CB[8]}_2$  heterodimer in  $\text{D}_2\text{O}$  at 278 K.

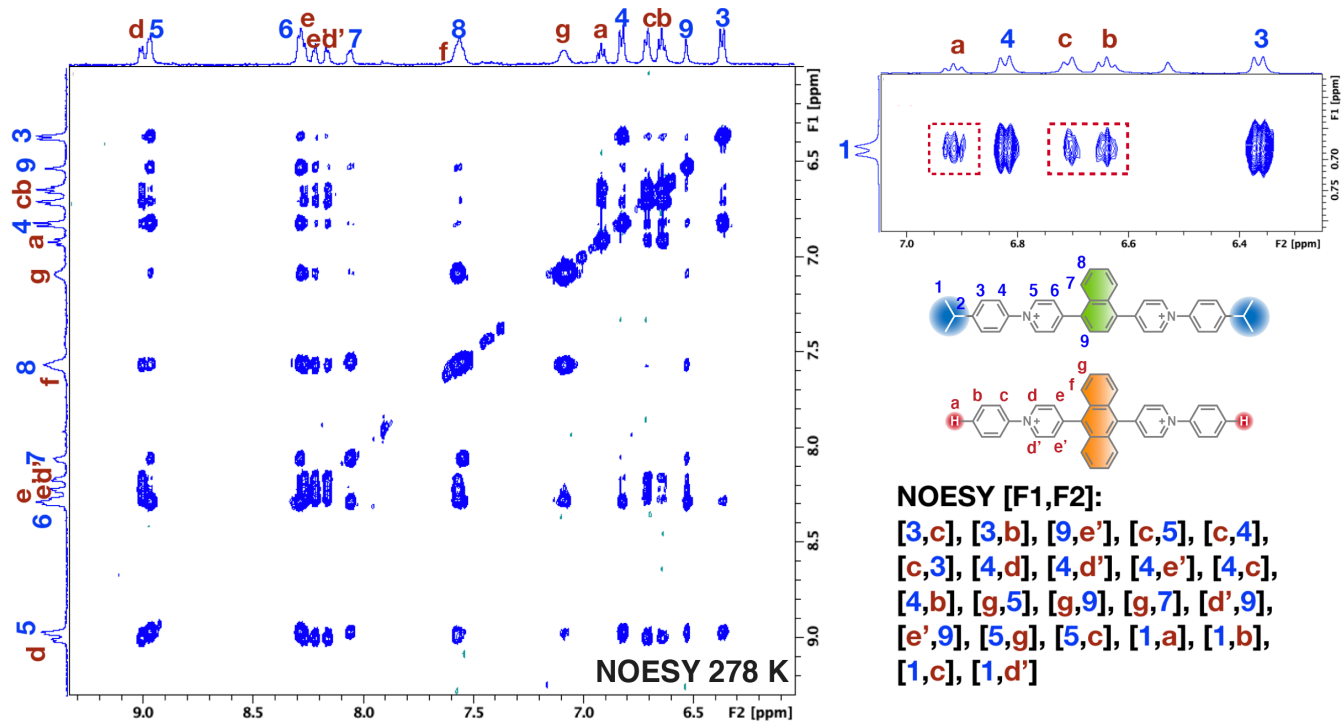

Figure S17. NOESY spectrum of  $\text{Np14CMe}_2 \cdot \text{Ant910H} \cdot \text{CB[8]}_2$  heterodimer in  $\text{D}_2\text{O}$  at 278 K (mixing time: 1200 ms). Correlation signals are easier to be observed under low temperature.

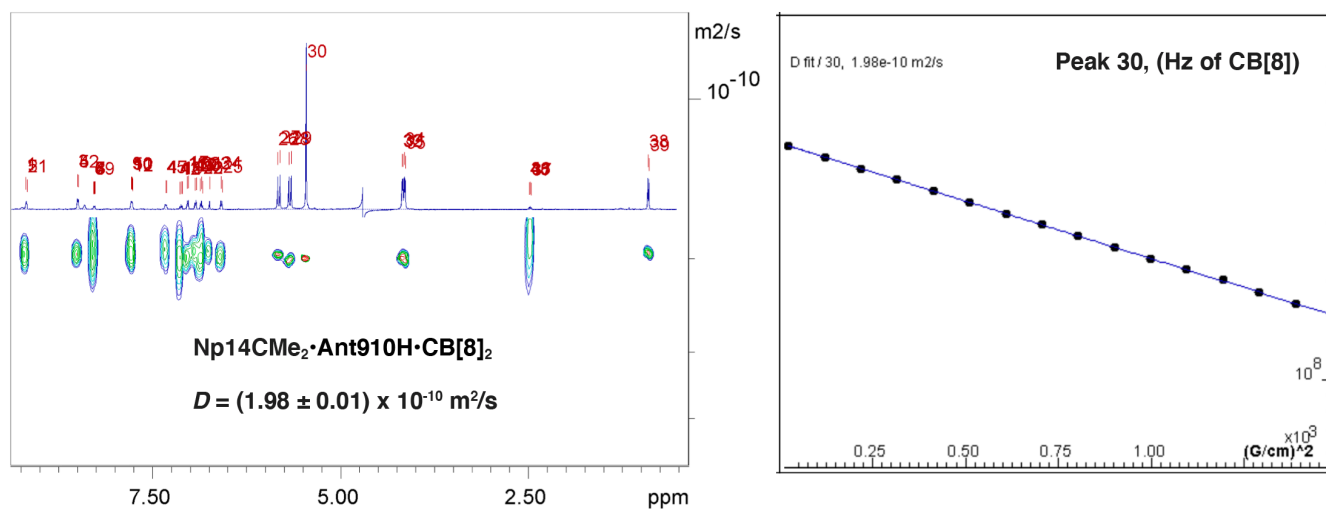

**Figure S18.** DOSY analysis for  $\text{Np14CMe}_2 \cdot \text{Ant910H} \cdot \text{CB[8]}_2$  heterodimer in  $\text{D}_2\text{O}$  at 298 K, showing one complex with a diffusion coefficient of  $1.98 \times 10^{-10} \text{ m}^2/\text{s}$ .

# SI-10 Mixture of Np14H, Ant910CMe<sub>2</sub>, and CB[8]

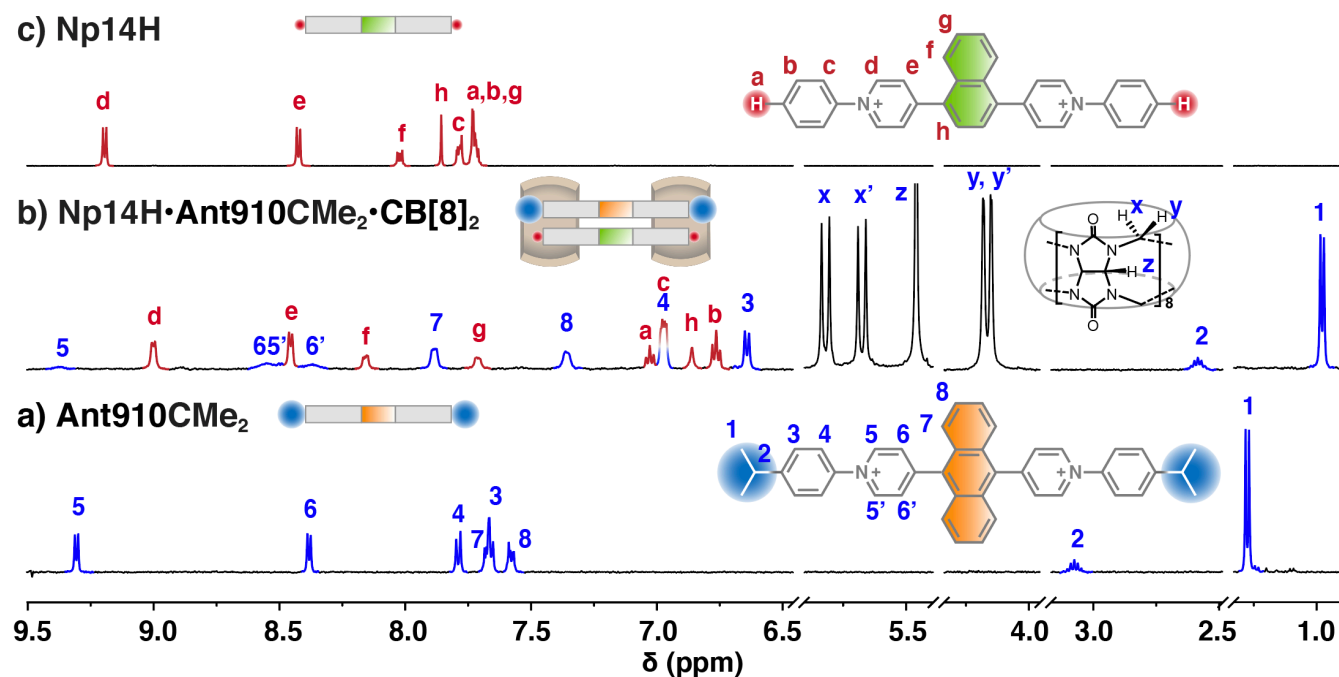

Figure S19. <sup>1</sup>H NMR spectra of a) Np14H, b) Np14H·Ant910CMe<sub>2</sub>·CB[8]<sub>2</sub>, c) Ant910CMe<sub>2</sub> in D<sub>2</sub>O at 298 K. Protons are assigned using the COSY and NOESY spectra in Figure S21-22.

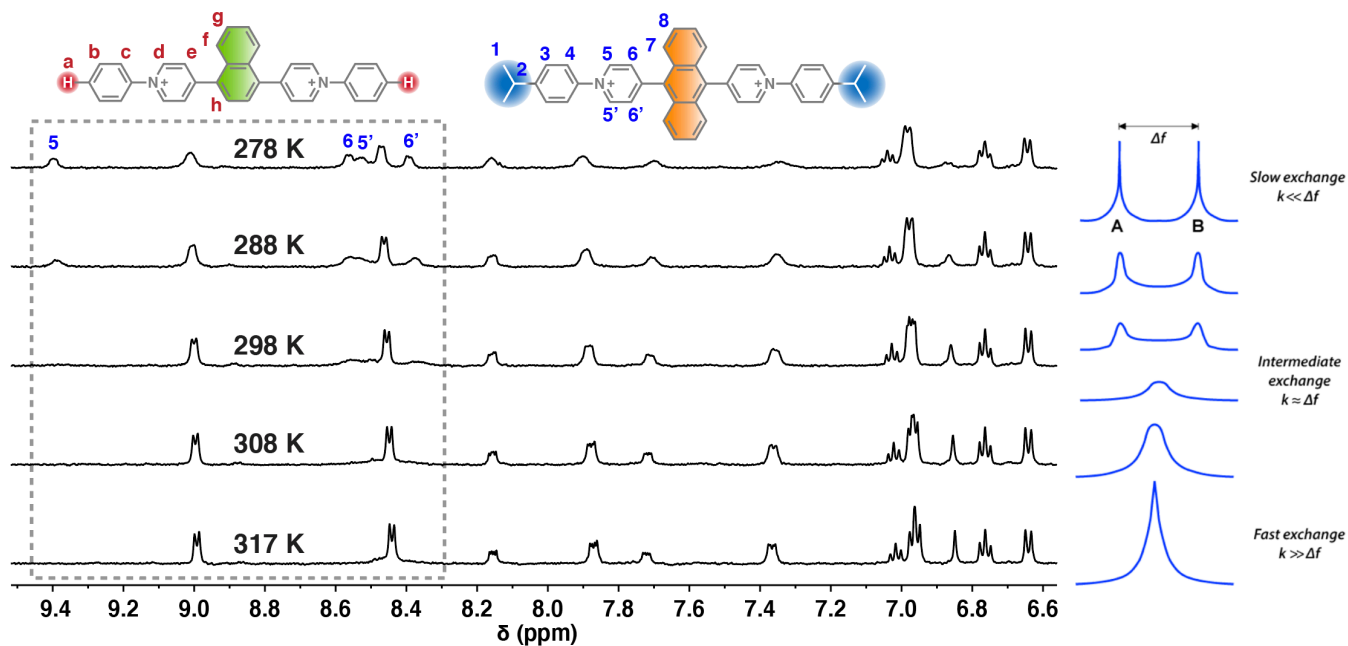

Figure S20. VT-NMR spectra of Np14H·Ant910CMe<sub>2</sub>·CB[8]<sub>2</sub> in D<sub>2</sub>O.

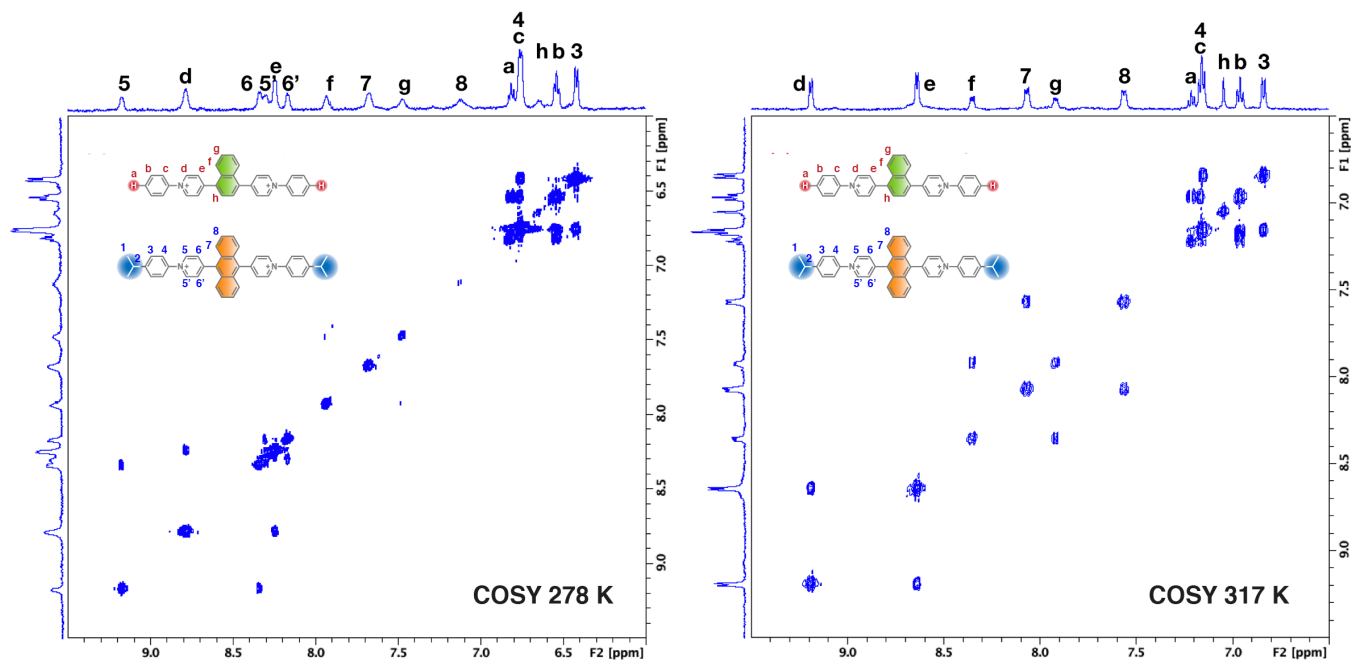

Figure S21. COSY spectra of Np14H• Ant910CMe<sub>2</sub>•CB[8]<sub>2</sub> heterodimer in D<sub>2</sub>O at 278 K and 317 K.

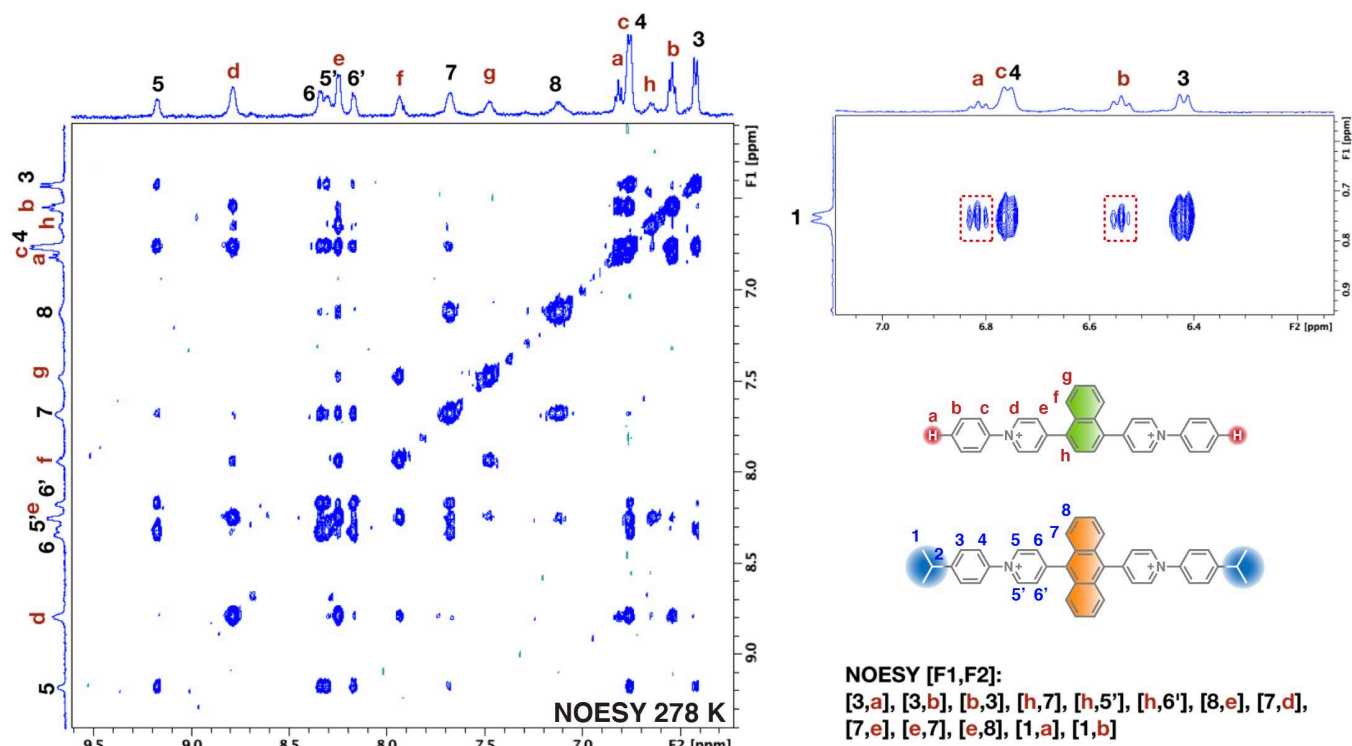

Figure S22. NOESY spectrum of Np14H• Ant910CMe<sub>2</sub>•CB[8]<sub>2</sub> heterodimer in D<sub>2</sub>O at 278 K (mixing time: 1200 ms). Correlation signals are easier to be observed under low temperature.

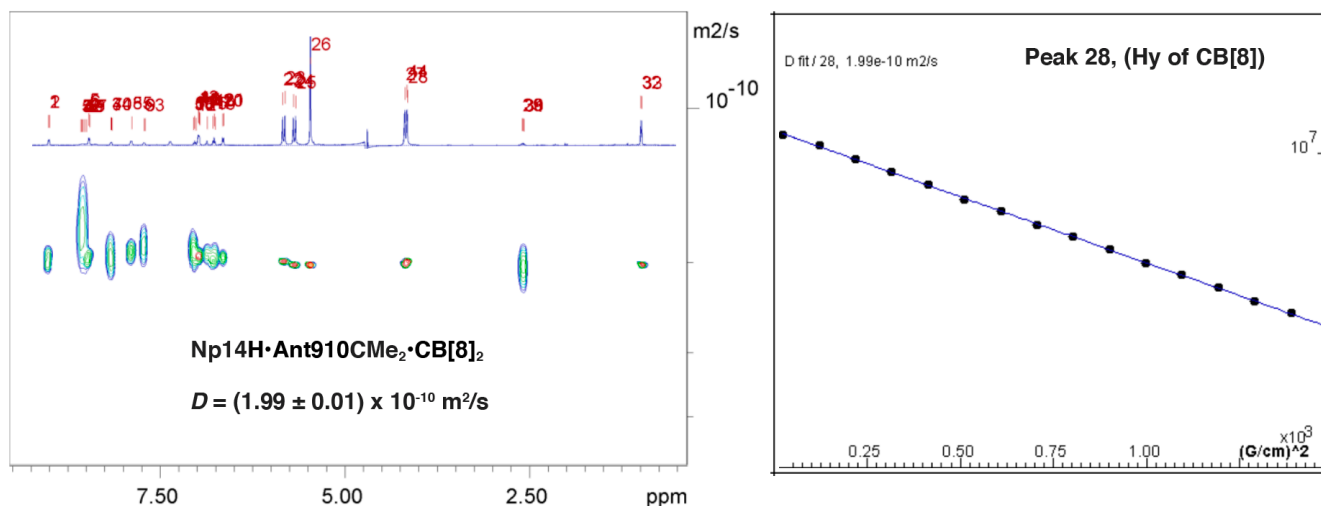

**Figure S23.** DOSY analysis for  $\text{Np14H}\cdot\text{Ant910CMe}_2\cdot\text{CB[8]}_2$  heterodimer in  $\text{D}_2\text{O}$  at 298 K, showing one complex with a diffusion coefficient of  $1.99 \times 10^{-10} \text{ m}^2/\text{s}$ .

## SI-11 Diffusion coefficient of CB[8]-directed dimers

**Table S1.** Diffusion coefficient of CB[8]-directed dimers from DOSY in  $\text{D}_2\text{O}$  at 298 K.

| Species                            | Diffusion Coefficient ( $10^{-10} \cdot \text{m}^2/\text{s}$ )    |                             |                             |
|------------------------------------|-------------------------------------------------------------------|-----------------------------|-----------------------------|
|                                    | $\text{G}_2\text{-CB[8]}_2^{[6]}$ or $\text{G-G}'\text{-CB[8]}_2$ | $\text{G}_2\text{-CB[8]}_3$ | $\text{G}_1\text{-CB[8]}_1$ |
| <i>Ant910Me</i>                    | $2.04 \pm 0.01$                                                   | -                           | -                           |
| <i>Ant15Me</i>                     | $1.98 \pm 0.01$                                                   | -                           | -                           |
| <i>Np27Me</i>                      | $2.00 \pm 0.01$                                                   | -                           | -                           |
| <i>Np14Me</i>                      | $1.98 \pm 0.01$                                                   | -                           | -                           |
| <i>Np15Me</i>                      | $2.00 \pm 0.01$                                                   | -                           | -                           |
| <i>Ph14Me</i>                      | $2.06 \pm 0.01$                                                   | -                           | -                           |
| <i>Ph13Me</i>                      | $2.07 \pm 0.01$                                                   | -                           | -                           |
| <i>Ph135Me</i>                     | N.D.                                                              | $1.79 \pm 0.01$             | -                           |
| <i>VNMe<sub>2</sub></i>            | $2.01 \pm 0.01$                                                   | -                           | -                           |
| <i>dzpy</i>                        | -                                                                 | -                           | $3.04 \pm 0.01$             |
| <i>CB[8]</i>                       | -                                                                 | -                           | $3.11 \pm 0.01$             |
| <i>Np14H</i>                       | $2.06 \pm 0.01$                                                   | -                           | -                           |
| <i>Np14H-Np14NMe<sub>2</sub></i>   | $2.00 \pm 0.01$                                                   | -                           | -                           |
| <i>Np14H-Np14CMe<sub>2</sub></i>   | $2.02 \pm 0.01$                                                   | -                           | -                           |
| <i>Np14CMe<sub>2</sub>-Ant910H</i> | $1.98 \pm 0.01$                                                   | -                           | -                           |
| <i>Np14H-Ant910CMe<sub>2</sub></i> | $1.99 \pm 0.01$                                                   | -                           | -                           |

## SI-12 Complexation of Ant910H and Np14CMe<sub>2</sub> with CB[7]

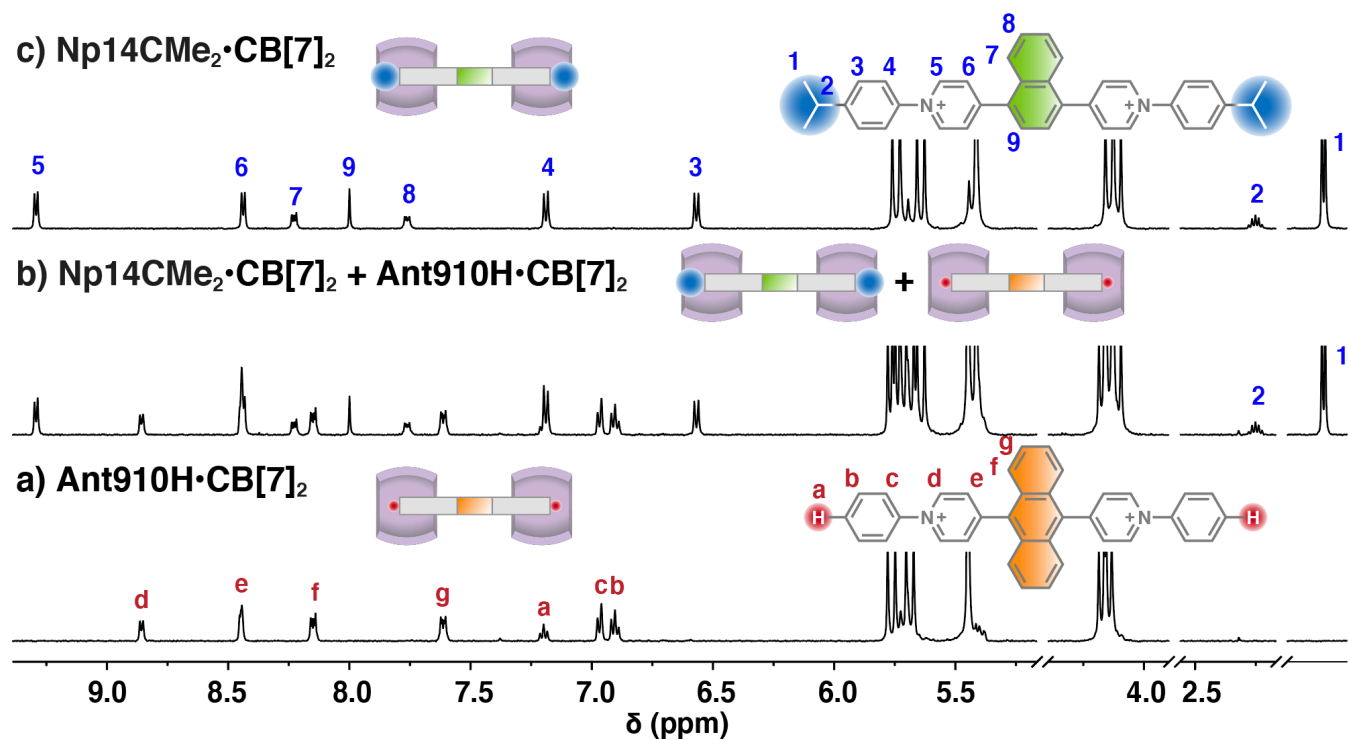

## SI-13 Excitation spectrum of Ant910H and Np14CMe<sub>2</sub> dimers

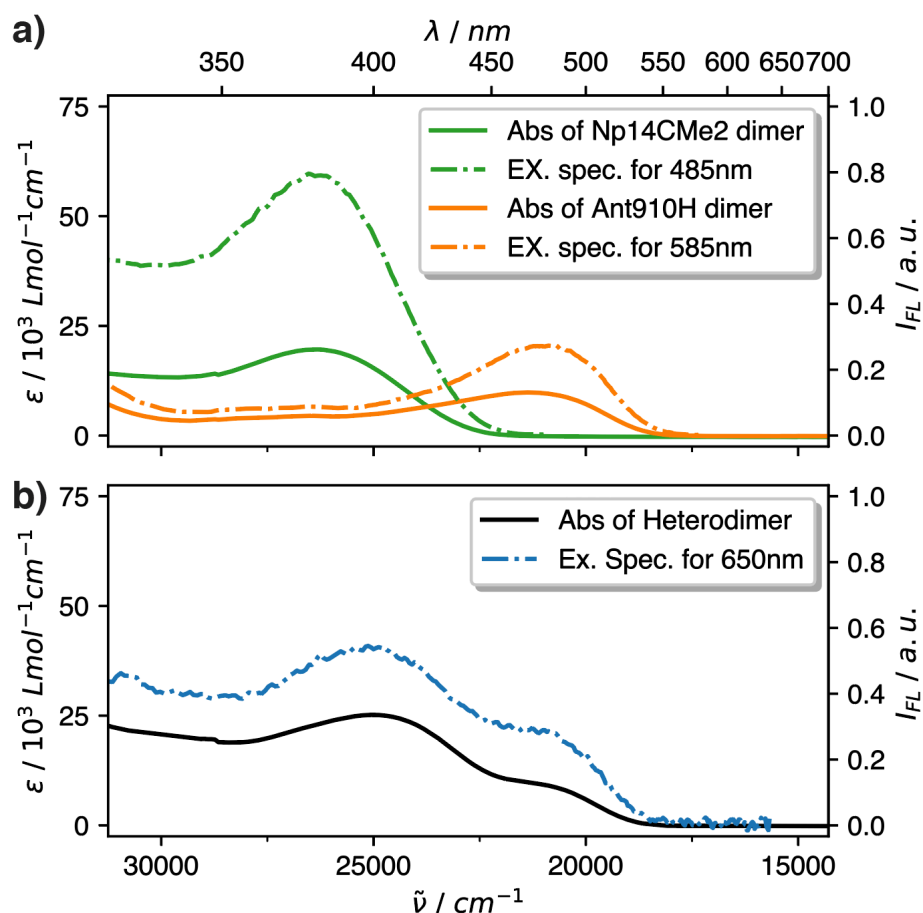

**Figure S25.** Absorption (solid line) and excitation spectra (dash dotted line) of a) Np14CMe<sub>2</sub> (green) or Ant910H (orange) homodimers and b) Np14CMe<sub>2</sub>•Ant910H• CB[8]<sub>2</sub> heterodimer in D<sub>2</sub>O (20  $\mu\text{M}$ ). The excitation spectra of Np14CMe<sub>2</sub>•Ant910H• CB[8]<sub>2</sub> was detected at 650 nm, which corresponds to the emission solely from anthracene moiety without interference from naphthalene. The intense excitation band around 400 nm confirms an energy-transfer contribution from Np14CMe<sub>2</sub> to the emission of Ant910H.

## Reference

- [1] Day, A.; Arnold, A. P.; Blanch, R. J.; Snushall, B. *J. Org. Chem.* **2001**, *66*, 8094–8100.
- [2] Bongard, D.; Möller, M.; Rao, S. N.; Corr, D.; Walder, L. *Helv. Chim. Acta* **2005**, *88*, 3200–3209.
- [3] Biedermann, F.; Scherman, O. A. *J. Phys. Chem. B* **2012**, *116* (9), 2842–2849.
- [4] Zhang, W.; Gan, S.; Vezzoli, A.; Davidson, R. J.; Milan, D. C.; Luzyanin, K. V.; Higgins, S. J.; Nichols, R. J.; Beeby, A.; Low, P. J.; Li, B.; Niu, L. *ACS Nano* **2016**, *10*, 5212–5220.
- [5] Wu, G.; Olesińska, M.; Wu Y.; Matak-Vinkovic D.; Scherman, O. A. *J. Am. Chem. Soc.* **2017**, *139*, 3202–3208
- [6] Wu, G.; Bae, Y. J.; Olesińska, M.; Antón-García, D.; Szabó, I.; Rosta, E.; Wasielewski, M. R.; Scherman, O. A. *Chem. Sci.* **2020**, *11*, 812–825.
- [7] Olesińska, M.; Wu, G.; Gómez-Coca, S.; Antón-García, D.; Szabó, I.; Rosta, E.; Scherman, O. A. *Chem. Sci.* **2019**, *10*, 8806–8811.
